1 **Metabolic strategies shared by basement residents of the Lost City hydrothermal field**

2  
3 William J. Brazelton<sup>1#</sup>, Julia M. McGonigle<sup>1,2</sup>, Shahrzad Motamedi<sup>1</sup>, H. Lizethe Pendleton<sup>1</sup>,  
4 Katrina I. Twing<sup>1\*</sup>, Briggs C. Miller<sup>1</sup>, William J. Lowe<sup>1</sup>, Alessandrina M. Hoffman<sup>1</sup>, Cecilia A.  
5 Prator<sup>1</sup>, Grayson L. Chadwick<sup>3</sup>, Rika E. Anderson<sup>4</sup>, Elaina Thomas<sup>4</sup>, David A. Butterfield<sup>5</sup>,  
6 Karmina A. Aquino<sup>6</sup>, Gretchen L. Früh-Green<sup>6</sup>, Matthew O. Schrenk<sup>7</sup>, Susan Q. Lang<sup>8</sup>

7  
8  
9 <sup>1</sup>School of Biological Sciences, University of Utah, Salt Lake City, UT

10 <sup>2</sup>Bigelow Laboratory for Ocean Sciences, 60 Bigelow Dr, East Boothbay, ME

11 <sup>3</sup>Department of Molecular and Cell Biology, University of California, Berkeley, CA

12 <sup>4</sup>Department of Biology, Carleton College, Northfield, MN

13 <sup>5</sup>Joint Institute for the Study of Atmosphere and Ocean, University of Washington, Seattle, WA

14 <sup>6</sup>Department of Earth Sciences, ETH Zurich, Zurich, Switzerland

15 <sup>7</sup>Department of Earth and Environmental Sciences, Michigan State University, East Lansing, MI

16 <sup>8</sup>School of the Earth, Ocean, and Environment, University of South Carolina, Columbia, SC,  
17 USA

18  
19 \*Present address:

20 Department of Microbiology, Weber State University, Ogden, UT, USA

21  
22 #Corresponding author: [william.brazelton@utah.edu](mailto:william.brazelton@utah.edu)

23  
24  
25 Running title:

26 Metabolic strategies of Lost City's basement residents

27  
28  
29 Abstract word count: 228

30 Importance word count: 147

31 Text word count: 5,251

32

33 **ABSTRACT**

34 Alkaline fluids venting from chimneys of the Lost City hydrothermal field flow from a  
35 potentially vast microbial habitat within the seafloor where energy and organic molecules are  
36 released by chemical reactions within rocks uplifted from Earth's mantle. In this study, we  
37 investigated hydrothermal fluids venting from Lost City chimneys as windows into subseafloor  
38 environments where the products of geochemical reactions, such as hydrogen (H<sub>2</sub>), formate, and  
39 methane, may be the only available sources of energy for biological activity. Our deep  
40 sequencing of metagenomes and metatranscriptomes from these hydrothermal fluids revealed a  
41 few key species of archaea and bacteria that are likely to play critical roles in the subseafloor  
42 microbial ecosystem. We identified a population of *Thermodesulfovibrionales* (belonging to  
43 phylum *Nitrospirae*) as a prevalent sulfate-reducing bacterium that may be responsible for much  
44 of the consumption of H<sub>2</sub> and sulfate in Lost City fluids. Metagenome-assembled genomes  
45 (MAGs) classified as *Methanosarcinaceae* and Candidatus *Bipolaricaulota* were also recovered  
46 from venting fluids and represent potential methanogenic and acetogenic members of the  
47 subseafloor ecosystem. These genomes share novel hydrogenases and formate dehydrogenase-  
48 like sequences that may be unique to hydrothermal and subsurface alkaline environments where  
49 hydrogen and formate are much more abundant than carbon dioxide. The results of this study  
50 include multiple examples of metabolic strategies that appear to be advantageous in  
51 hydrothermal and subsurface environments where energy and carbon are provided by  
52 geochemical reactions.

53

54

55

56 **IMPORTANCE**

57 The Lost City hydrothermal field is an iconic example of a microbial ecosystem fueled by energy  
58 and carbon from Earth's mantle. Uplift of mantle rocks into the seafloor can trigger a process  
59 known as serpentinization that releases hydrogen and creates unusual environmental conditions  
60 where simple organic carbon molecules are more stable than dissolved inorganic carbon. This  
61 study provides an initial glimpse into the kinds of microbes that live deep within the seafloor  
62 where serpentinization takes place, by sampling hydrothermal fluids exiting from the Lost City  
63 chimneys. The metabolic strategies that these microbes appear to be using are also shared by  
64 microbes that inhabit other sites of serpentinization, including continental subsurface  
65 environments and natural springs. Therefore, the results of this study contribute to a broader,  
66 interdisciplinary effort to understand the general principles and mechanisms by which  
67 serpentinization-associated processes can support life on Earth and perhaps other worlds.

68

69

70

71

72

## 73 INTRODUCTION

74 The fixation of carbon dioxide into organic carbon by autotrophic organisms is the foundation of  
75 all ecosystems on Earth. Even in subsurface environments, organic carbon is provided by  
76 fixation of carbon dioxide by chemoautotrophs or else from the degradation of organic carbon  
77 originally produced in photosynthetic ecosystems and transported into the subsurface. However,  
78 organic carbon can form abiotically in hydrothermal environments, particularly in those that  
79 favor a set of geochemical reactions collectively known as serpentinization (McCollom &  
80 Seewald, 2007; Martin et al., 2008). Microbial communities in serpentinizing environments are  
81 likely to benefit from the abiotic synthesis of simple organic compounds, but the processes and  
82 mechanisms that may allow this to occur are unknown.

83

84 The Lost City hydrothermal field is located near the summit of the Atlantis Massif, a submarine  
85 mountain formed by the uplift of ultramafic rocks from Earth's upper mantle and emplacement  
86 onto the seafloor along a major fault zone (Kelley et al., 2005; Karson et al., 2006; Früh-Green et  
87 al., 2018). Serpentinization of the Atlantis Massif results in the generation of hydrogen gas (H<sub>2</sub>)  
88 and hydrothermal fluids that are rich in formate, methane, and perhaps other forms of organic  
89 carbon (Proskurowski et al., 2008; Lang et al., 2012, 2018). Dissolved inorganic carbon is  
90 vanishingly rare in the pH 9-11 hydrothermal fluids that vent from Lost City chimneys because it  
91 is either reduced to formate or methane or else precipitated as carbonate minerals (Proskurowski  
92 et al., 2008; Ternieten, Früh-Green & Bernasconi, 2021). Sulfate, in contrast, appears to be an  
93 available oxidant throughout the subseafloor because it is never completely consumed by the  
94 relatively moderate hydrothermal conditions within the Atlantis Massif (Kelley et al., 2005; Lang  
95 & Brazelton, 2020).

96

97 Dense biofilm communities coating the surfaces of Lost City chimneys are capable of utilizing  
98 this bounty of energy and carbon released from the mantle (Lang et al., 2018; McGonigle, Lang  
99 & Brazelton, 2020). However, these biofilms form in mixing zones where warm, anoxic  
100 hydrothermal fluids vent into cold, oxic seawater. These conditions may not be representative of  
101 subseafloor environments within the Atlantis Massif where habitats are probably confined to  
102 sparsely distributed fractures and channels within rocks that have limited exposure to seawater  
103 (Früh-Green et al., 2018; Motamedi et al., 2020). In particular, dissolved inorganic carbon is  
104 provided by ambient seawater to chimney biofilm communities, while its availability is severely  
105 limited in subseafloor habitats dominated by the products of serpentinization.

106

107 The microbiology of fluids venting from Lost City chimneys has been explored in only one study  
108 (Brazelton et al., 2006), as all other microbiological research at Lost City has focused on the  
109 chimney biofilms (Brazelton et al., 2010, 2011; Lang et al., 2012, 2018; McGonigle, Lang &  
110 Brazelton, 2020; Lang & Brazelton, 2020). That early census of microbial diversity identified  
111 several novel 16S rRNA sequences, but they were poorly classified due to the limitations of  
112 microbial taxonomy at the time (Brazelton et al., 2006). In particular, the presence of potential  
113 sulfate-reducing bacteria (SRB) in Lost City fluids has been a mystery despite clear  
114 biogeochemical trends that indicate widespread SRB activity in the subseafloor (Lang et al.,  
115 2018; Lang & Brazelton, 2020).

116

117 A deep-sea expedition to the Lost City in 2018 was designed to fill this knowledge gap by  
118 investigating the microbiology and biogeochemistry of fluids venting from Lost City chimneys

119 (Lang et al., 2021). We exploited natural biogeochemical trends in fluids venting from distinct  
120 chimney locations within the Lost City field to test hypotheses about seafloor microbial  
121 metabolic activity. Here we report initial results from the sequencing of DNA and RNA in Lost  
122 City fluids, including the first sequences of metagenomes and metatranscriptomes from Lost City  
123 hydrothermal fluids. We identify a few key archaea and bacteria that appear to be indicative of  
124 seafloor habitats strongly influenced by serpentinization. These results highlight metabolic  
125 strategies and adaptations that are common to life fueled by the products of serpentinization,  
126 including the potential use of formate and other simple forms of organic carbon as the primary  
127 sources of carbon for the ecosystem.

128

129

## 130 **RESULTS**

### 131 **Characteristics of Lost City hydrothermal fluid samples**

132 Hydrothermal fluid samples were collected from actively venting chimneys at the Lost City  
133 hydrothermal field (**Figure 1; Supplemental Figure S1**) using ROV *Jason* during the 2018 Lost  
134 City expedition aboard R/V *Atlantis* (AT42-01). This study includes 39 samples of hydrothermal  
135 fluids that were dedicated to DNA and RNA sequencing, including analyses of amplicon  
136 sequence variants (ASVs), metagenomes, and metatranscriptomes (**Table 1; Supplemental**  
137 **Table S1**).

138

139 The fluid samples ranged from those that were barely distinguishable from ambient seawater  
140 (~11 °C, pH 8) to warm and highly alkaline hydrothermal fluids (~80 °C, pH 10). Direct counts  
141 of visible cells showed little variability among fluids, with densities approximately  $2-8 \times 10^4 \text{ mL}^{-1}$

142 <sup>1</sup> in all samples, although the two samples with the highest temperatures had the least number of  
143 cells (**Table 1**).

144

145 Fluids venting from Markers 3 and C contained ASV compositions that were notably distinct  
146 from those of all other fluids (**Figure 1**), including high relative abundances of

147 *Thermodesulfobirionia*, *Desulfotomaculum*, and *Bipolaricaulota* (**Figure 2; Supplemental**

148 **Table S2**). In addition, Marker 3 fluids were rich in metagenomic sequences classified as family

149 *Methanosarcinaceae*, which includes the dominant archaeal phylotype previously detected in

150 Lost City chimneys (Schrenk et al., 2004; Brazelton et al., 2010, 2011). The greater

151 representation of archaeal sequences in the metagenomes suggests a bias against archaeal

152 sequences in the ASV dataset.

153

154 Fluids venting from Camel Humps contained a remarkably even distribution of ASVs that

155 included *Sulfurovum*, *Sulfurospirillum*, and *Thiomicrothrix* at similar abundances as taxa

156 typically associated with ambient seawater (e.g., *Alteromonas*, *Roseobacter*, *Halomonas*). The

157 overall microbial community structure of Sombrero fluids is broadly similar to that of Camel

158 Humps fluids, although warmer and more sulfidic Sombrero fluids included greater proportions

159 of taxa that were also abundant in fluids from Markers 3 and C (**Figure 2**). Fluid samples from

160 the chimneys at Markers 2 and 8 were dominated by bacteria that are ubiquitous in chimney

161 surface biofilm communities (Brazelton et al., 2006, 2010).

162

163 In general, the proportion of ambient seawater in each hydrothermal fluid sample, as measured

164 by Mg concentration, did not predict the presence of microbes likely to inhabit anoxic,

165 subseafloor environments. Instead, the distribution of anaerobic taxa most likely to be strongly  
166 linked with serpentinization (e.g., *Methanosarcinaceae*, *Thermodesulfovibrionia*,  
167 *Desulfotomaculum*, and *Bipolaricaulota*) was strongly chimney-specific, indicating a strong  
168 influence of subsurface conditions that is only weakly mitigated by the mixture of seawater  
169 during sampling. Detailed comparisons of the hydrothermal fluid samples are provided in the  
170 **Supplemental Material**.

171

### 172 **Metagenome-Assembled Genomes (MAGs)**

173 A total of 305 MAGs with at least 50% estimated completion were recovered from the pooled  
174 “all fluids” assembly and the six chimney-specific assemblies (**Supplemental Figure S3**;  
175 **Supplemental Table S4**). MAGs that were representative of the taxa enriched in Markers 3 and  
176 C, as well as MAGs that contained key genes associated with the metabolism of H<sub>2</sub>, sulfate,  
177 formate, and methane, were selected for additional analyses.

178

179 Re-assembly and manual refinement of these sequences (**Supplemental Material**) resulted in 30  
180 refined and curated MAGs (**Figure 3**) that are at least medium-quality (>50% complete, <10%  
181 redundancy, (Bowers et al., 2017). Generally, these MAGs are most abundant in Marker 3,  
182 Calypso, or Sombrero, and they are nearly absent in Camel Humps and Marker 2.  
183 (Unfortunately, metagenomic sequences could not be obtained from Marker C or Marker 8). A  
184 single *Methanosarcinaceae* MAG was especially abundant in the fluids from Marker 3 (**Figure**  
185 **3**). Each of these MAGs represent new species (or else represent novel taxa we have previously  
186 detected at Lost City), and our phylogenetic analyses indicate that the *Methanosarcinaceae*,



187 *Thermodesulfovibrionales*, and *Bipolaricaulota* MAGs most likely represent novel genera  
188 (**Supplemental Figures S5-S7**).

189

190 Below, we briefly describe key features of these MAGs that seem relevant to an initial  
191 exploration of the Lost City seafloor ecosystem, focusing on genes associated with the  
192 metabolism of H<sub>2</sub>, formate, sulfur, and methane. Additional information about each MAG is  
193 reported in the **Supplemental Material**, including detailed descriptions of genomic content and  
194 predicted protein functions (**Supplemental Tables S5-S6**).

195

## 196 **Hydrogenases**

197 [NiFe]-hydrogenases typically associated with H<sub>2</sub> oxidation were found in  
198 *Thermodesulfovibrionales* MAG-1293 (HyaAB), *Methanocellales* MAG-838 (HyaAB), and  
199 *Bipolaricaulota* MAG-1503 (HoxYH) (**Figure 4**). Of these, the *Thermodesulfovibrionales* MAG  
200 was by far the most abundant in venting fluids (**Figure 3**). *Methanosarcinaceae* MAG-1276  
201 encodes two hydrogenases associated with methanogenesis: F<sub>420</sub>-reducing hydrogenase (FrhAB)  
202 and Ech hydrogenase (EchCE). It also encodes a formate dehydrogenase that can provide  
203 electrons to MvhD and HdrABC instead of the H<sub>2</sub>-oxidizing Vho/Vht enzyme (Costa et al.,  
204 2013). Thus, Lost City *Methanosarcinaceae* may power methanogenesis with electrons from  
205 both H<sub>2</sub> and formate. The same MvhD-HdrABC complex, without FDH, was also found in  
206 MAGs classified as ANME-1, *Natronincolaceae*, and *Bipolaricaulota* (**Supplemental Table S5**).

207

208 In addition, the *Methanosarcinaceae* and ANME-1 MAGs contain a complete 14-gene cluster  
209 (mbhA-N) encoding membrane-bound hydrogenase (Mbh) (**Figure 5; Supplemental Figure**

210 **S8**). For each predicted gene in the cluster, the homologs in the *Methanosarcinaceae* and  
211 ANME-1 MAGs are more similar to each other than to any other sequences in public databases.  
212 The same gene cluster, with conserved synteny, is also found in methanogens belonging to the  
213 order *Methanomicrobiales* and in heterotrophs of the order *Thermococcales* (Thauer et al.,  
214 2010). The MbhL subunits from these methanogens have only 42-45% identities with the Lost  
215 City MbhL sequences reported here, which have greater similarity (~49% identities) to MbhL  
216 sequences from *Thermococcus*. Bipolaricaulota MAG-1503 also includes a predicted MbhL  
217 sequence, which is most closely related to two Bipolaricaulota MAGs from hydrothermal  
218 systems: the Mid-Cayman Rise (Zhou et al., 2020) and Guaymas Basin (Dombrowski, Teske &  
219 Baker, 2018) (**Figure 5**).

220  
221 [NiFe]-hydrogenase sequences (HyaAB) were also highly abundant in Sombrero and Camel  
222 Humps fluids (**Supplemental Table S7**), where they were primarily encoded by  
223 *Thiomicrothabodus*. We did not prioritize the analysis of *Thiomicrothabodus* MAGs because our  
224 prior work indicated that they inhabit oxygenated biofilm communities on chimney surfaces  
225 (Brazelton & Baross, 2010). We previously noted the absence of hydrogenase sequences  
226 phylogenetically linked with these bacteria (Brazelton, Nelson & Schrenk, 2012), but recent  
227 sequencing of additional genomes from *Thiomicrospira*, *Thiomicrothabodus*, and  
228 *Hydrogenovibrio* (Scott et al., 2018) has revealed that many of the hydrogenase sequences in  
229 Lost City metagenomes are affiliated with these taxa after all.

230  
231 [FeFe]-hydrogenases typically associated with the production of H<sub>2</sub> during fermentation were  
232 represented by HndCD sequences in several MAGs (**Figure 4**). This hydrogenase is capable of

233 H<sub>2</sub> oxidation with reduction of NADP in some organisms (Kpebe et al., 2018), but the presence  
234 of only one subunit in multiple Lost City MAGs (**Figure 4**) is curious and has unknown  
235 implications for the ability of these organisms to either consume or produce H<sub>2</sub>.

236

### 237 **Formate dehydrogenase and transporters**

238 Formate dehydrogenase (FDH) catalyzes the reversible oxidation of formate to carbon dioxide,  
239 and various forms of FDH have diverse physiological roles in all three domains of life (Maia,  
240 Moura & Moura, 2015). Oxidation of formate was detected in all Lost City fluid samples,  
241 including those with significant contributions from ambient seawater (**Supplemental Table S8**).

242

243 We identified at least three kinds of FDH in Lost City fluids plus two distinct variants of FDH-  
244 like sequences. (1) NAD(P)-dependent FDH catalyzing formate oxidation in bacteria (K00123;  
245 FdoG/FdhF/FdwA) was detected in *Thermodesulfovibrionales* and WOR-3 MAGs. (2) NAD(P)-  
246 dependent FDH catalyzing reduction of carbon dioxide into formate (K05299; FdhA) was  
247 detected in Bipolaricaulota, *Thermodesulfovibrionales*, *Desulfotomaculum*, and *Dehalococcoidia*  
248 MAGs. (3) F<sub>420</sub>-dependent FDH catalyzing formate oxidation in methanogens (FdhA) was  
249 detected in the *Methanosarcinaceae* MAG. (4) A divergent FDH-like sequence was detected in  
250 *Methanosarcinaceae*, ANME-1, Bipolaricaulota, and *Thermodesulfovibrionales* MAGs. (5)  
251 Another divergent FDH-like sequence was detected in the WOR-3 MAG (**Figure 4**).

252

253 The divergent FDH-like sequence shared by the *Methanosarcinaceae*, ANME-1, Bipolaricaulota,  
254 and *Thermodesulfovibrionales* MAGs is also found in MAGs and SAGs (single-amplified  
255 genomes) from three continental serpentinite-hosted springs: the Voltri Massif in Italy (Brazelton

256 et al., 2017), The Cedars in California, USA (Suzuki, Nealson & Ishii, 2018), and Hakuba Happo  
257 hot springs in Japan (Merino et al., 2020) (**Figure 6; Supplemental Figure S9**). All of these  
258 sequences from serpentinizing systems are more similar to each other than to any other  
259 sequences in public databases.

260

261 The formate transporters FdhC and FocA that were previously identified in Lost City chimney  
262 biofilms (Lang et al., 2018; McGonigle, Lang & Brazelton, 2020) were also detected in the  
263 metagenomes of venting fluids reported here, but they were only present at very low coverage  
264 (**Supplemental Table S7**), suggesting that they are specific to organisms inhabiting chimney  
265 biofilms. None of the MAGs highlighted by this study contain any known formate transporters.  
266 A lack of canonical formate transporters was also reported recently for a formate-utilizing  
267 methanogen in serpentinite-hosted, hyperalkaline groundwaters (Fones et al., 2021). Therefore,  
268 transport of formate into the cells of organisms inhabiting hyperalkaline subsurface  
269 environments may be carried out by uncharacterized proteins.

270

## 271 **Sulfate reduction**

272 Surprisingly, the samples of sulfidic fluids collected from the chimney at Marker 2 (**Table 1**) did  
273 not contain elevated levels of taxa expected to represent sulfate-reducing bacteria (SRB)  
274 (**Figures 2-3**) or the genes encoding dissimilatory sulfite reductase (DsrAB) (**Figure 7**). Instead,  
275 Marker 2 fluids are dominated by aerobic bacteria that are likely to be adapted to chimney  
276 biofilms or to shallow subsurface zones with exposure to ambient seawater. Potential SRB such  
277 as *Thermodesulfovibrionales* were most abundant in the fluids venting from Marker 3, Marker C,  
278 Sombrero, and Calypso (**Figures 2-3**).

279  
280 The other potential SRB in Lost City fluids include *Desulfotomaculum*, *Desulfocapsa*, and  
281 *Desulfobulbus*. *Desulfotomaculum* have been implicated as potential SRB in Lost City chimney  
282 biofilms (Gerasimchuk et al., 2010), but the *Desulfotomaculum* MAGs have neither  
283 hydrogenases nor carbon fixation enzymes, so their ability to reduce sulfate is dependent on the  
284 availability of organic matter. Furthermore, some *Desulfotomaculum* species are known to be  
285 incapable of sulfate reduction despite encoding DsrAB (Imachi et al., 2006). They do encode the  
286 nitrogenase enzyme required for nitrogen fixation, as do the *Methanosarcinaceae*, ANME-1, and  
287 *Thermodesulfovibrionales* MAGs (**Figure 4**). *Desulfobulbus* sequences were very rare in fluids  
288 from Markers 3 and C. *Desulfocapsa* were moderately abundant in Marker 3 fluids, but no  
289 MAGs classified as *Desulfocapsa* could be recovered during this study. Additionally, most of the  
290 dsrAB sequences in Lost City fluids were affiliated with *Thermodesulfovibrionales* or  
291 *Desulfotomaculum*; no dsrAB sequences belonging to *Desulfocapsa* or *Desulfobulbus* were  
292 identified in high-coverage contigs.

293

#### 294 **Methane oxidation**

295 Methane is present in Lost City fluids at a remarkably constant concentration of ~1 mM, while  
296 concentrations of H<sub>2</sub>, sulfate, sulfide, and other chemicals vary widely (Kelley et al., 2005; Lang  
297 et al., 2012; Aquino et al., In Revision). The source of the methane, i.e. whether it is synthesized  
298 abiotically as a product of serpentinization or released from carbon stored within basement rocks,  
299 remains uncertain (Kelley & Früh-Green, 1999; Wang et al., 2018; Klein, Grozeva & Seewald,  
300 2019; Labidi et al., 2020). Oxidation of methane was detected in most Lost City fluid samples,  
301 except the sample of Marker 3 fluids (**Supplemental Table S8**).

302

303 The primary candidates for the anaerobic oxidation of methane at Lost City are the ANME-1  
304 archaea, which are most abundant in Calypso fluids (**Figures 2-3**). The absence of cytochromes  
305 and presence of hydrogenases in the ANME-1 MAG was noted by (Chadwick et al., 2021) as  
306 consistent with the genomic features of the so-called “freshwater” clade of ANME-1, for which  
307 the genus “Candidatus Methanoalium” was proposed. One of the shared features within this  
308 clade, including the Lost City ANME-1 MAG, is a novel HdrABC-MvhADG complex, which is  
309 involved in the transfer of electrons derived from H<sub>2</sub> in methanogens. Therefore, this clade of  
310 ANME-1 may be involved in the H<sub>2</sub>-fueled production of methane instead of, or in addition to,  
311 the oxidation of methane. Distinguishing between methanogenesis and the anaerobic oxidation of  
312 methane with genomic data alone is notoriously difficult (Chadwick et al., 2021), and the  
313 *Methanosarcinaceae* and ANME-1 MAGs reported here contain features that are potentially  
314 consistent with both the production and oxidation of methane.

315

316 Potential methanotrophic bacteria were represented by ASVs classified as the  
317 gammaproteobacterial family *Methylomonaceae* (e.g. *Methylobacterium*), but they are expected  
318 to represent chimney biofilm communities (Brazelton et al., 2006) and were not abundant in any  
319 of the fluids included in this study. ASVs classified as *Methyloceanibacter*, various species of  
320 which can aerobically oxidize methane, methanol, or other methylated compounds (Vekeman et  
321 al., 2016), were prominent in Marker C fluids and very rare or absent in all other fluids  
322 (**Supplemental Table S2**).

323

324 **Carbonic anhydrase**

325 At the high pH conditions of Lost City fluids, dissolved bicarbonate and carbonate are more  
326 stable than carbon dioxide, and the potential use of bicarbonate or carbonate as carbon sources  
327 has been explored in studies of continental sites of serpentinization (Suzuki et al., 2014, 2017;  
328 Kohl et al., 2016; Miller et al., 2018; Kraus et al., 2021; Fones et al., 2021). Carbonic anhydrase  
329 catalyzes the reversible conversion between bicarbonate and carbon dioxide, which may enable  
330 cells to utilize bicarbonate obtained from the environment. *Methanosarcinaceae* MAG-1276  
331 encodes a carbonic anhydrase that shares 59-85% amino acid identities with sequences found in  
332 three other MAGs from Lost City (classified as NPL-UPA2 and Bipolaricaulota) and in one  
333 MAG from the Hakuba Happo hot spring (Nobu et al., 2021). These novel carbonic anhydrase  
334 sequences share only 35-41% amino acid identities with previously characterized proteins, e.g.  
335 the beta class carbonic anhydrases from *Clostridium aceticum* (**Supplemental Figure S10**). The  
336 Lost City carbonic anhydrase sequences retain each of the conserved residues highlighted by  
337 (Smith & Ferry, 2000) for beta class carbonic anhydrases. In addition, the *Methanosarcinaceae*  
338 MAG includes a predicted high-affinity bicarbonate transporter (SbtA).

339

#### 340 **Glycine reductase**

341 Glycine may be generated abiotically in high-H<sub>2</sub> conditions or released as a primary thermogenic  
342 degradation production of biomass (Amend & Shock, 1998; Aubrey, Cleaves & Bada, 2009;  
343 Lang et al., 2013; Dick & Shock, 2021). The reduction of glycine to acetyl-phosphate is  
344 catalyzed by glycine reductase, which has been identified in metagenomes from multiple  
345 serpentinite-hosted springs (Nobu et al., 2021). Seven of the Lost City MAGs encode glycine  
346 reductase, and in most of these genomes, glycine reductase (GrdEBCA) is in a gene cluster that  
347 includes selenium transferase (SelA), selenocysteine-specific elongation factor (SelB), and

348 thioredoxin (TrxA) (**Supplemental Table S5**), consistent with the gene organization of bacteria  
349 that conserve energy by reduction of glycine (Andreesen, 2004). Each of these MAGs also  
350 encodes partial Wood-Ljungdahl pathways, suggesting that they may use glycine reductase as  
351 part of the reductive glycine pathway for carbon fixation (Sánchez-Andrea et al., 2020).

352

### 353 **ATP synthase**

354 The production of ATP is catalyzed by the enzyme ATP synthase, which diverged into distinct  
355 archaeal and bacterial versions early in the evolution of life (Müller & Grüber, 2003). A few of  
356 the bacterial MAGs in this study encode the archaeal form of ATP synthase (A-type) instead of  
357 the bacterial form (F-type). These include *Dehalococcoidia* MAG-844, Paceibacteria MAG-855,  
358 WOR-3 MAG-1066, and all three NPL-UPA2 MAGs (**Supplemental Table S5**). Chloroflexi,  
359 Paceibacteria (previously named candidate phylum OD1), and NPL-UPA2 bacteria have also  
360 been observed to encode A-type ATP synthase in The Cedars, a continental serpentinite spring  
361 (Suzuki et al., 2017; Suzuki, Neelson & Ishii, 2018), suggesting that the A-type ATP synthase  
362 may provide advantages to both bacteria and archaea in the high pH, highly reducing conditions  
363 created by serpentinitization.

364

365 In addition, ATP synthase was completely absent in three of the Paceibacteria MAGs, as was the  
366 case for multiple Paceibacteria MAGs from The Cedars (Suzuki et al., 2017). *Natronincolaceae*  
367 MAG-1138 also lacks any ATP synthase genes, and its genomic content suggests an obligate  
368 fermentative lifestyle (**Supplemental Material**). Other genera within family *Natronincolaceae*  
369 include *Alkaliphilus* and *Serpentinicella*, which have been isolated from the Prony Bay  
370 hydrothermal field (Mei et al., 2016; Postec et al., 2021).



371

## 372 **DISCUSSION**

### 373 **Distinct zones of microbial activity in Lost City's basement**

374 The massive edifice of Poseidon towers 60 meters above the center of the Lost City  
375 hydrothermal field (**Figure 1**). Alkaline hydrothermal fluids flow from the serpentinite basement  
376 and throughout the Poseidon structure, exiting at multiple locations across the field. The  
377 differing flow paths that lead to each location have distinct residence times (Moore et al., 2021)  
378 and produce distinct chemical and microbiological compositions of the venting fluids (Lang et  
379 al., 2012, 2018, 2021; Aquino et al., In Revision).

380

381 For example, the venting locations Marker 3 and Camel Humps sit only a few meters from each  
382 other at the summit of Poseidon, but the fluids venting from each structure appear to have taken  
383 different paths, which is reflected in their distinct microbial communities. Marker 3 fluids are  
384 dominated by a few archaeal and bacterial species that have the genomic potential to metabolize  
385 H<sub>2</sub>, formate, and sulfate. Genes encoding methanogenesis, sulfate reduction, and carbon fixation  
386 are much more abundant in Marker 3 fluids than genes encoding aerobic respiration (**Figure 7;**  
387 **Supplemental Figures S12-S15**). In contrast, Camel Humps fluids host a diverse assemblage of  
388 bacteria capable of using oxygen, nitrate, and nitrite as oxidants. These taxonomic and metabolic  
389 patterns are generally similar between ribosomal gene and ribosomal RNA datasets (**Figure 2**)  
390 and between metagenomes and metatranscriptomes (**Figures 3 and 7**) from the same locations,  
391 indicating that the most abundant organisms in these fluids were likely to have been  
392 metabolically active at the time of sampling.

393

394 **Sulfate reduction is limited to a few taxa in the seafloor**

395 Previous studies of Lost City hydrothermal fluids have revealed a consistent trend across the  
396 field in which the consumption of H<sub>2</sub> and sulfate is correlated with the production of hydrogen  
397 sulfide (Proskurowski et al., 2008; Lang et al., 2012, 2018). Therefore, sulfate-reducing bacteria  
398 (SRB) are expected to be widespread and metabolically active in the subsurface environments  
399 below the Lost City chimneys.

400

401 The metagenomic results presented here indicate a single, novel species of  
402 *Thermodesulfovibrionales* as the SRB that is most likely to be responsible for these trends. It  
403 dominates the fluids at Marker C, Marker 3, and Calypso, and it accounts for most of the genes  
404 associated with sulfate reduction and H<sub>2</sub> oxidation in these fluids. It also includes multiple  
405 formate dehydrogenases and various genes indicative of organic carbon oxidation  
406 (**Supplemental Table S5**), suggesting metabolic flexibility that is not dependent on the  
407 availability of H<sub>2</sub> and inorganic carbon.

408

409 The Lost City *Thermodesulfovibrionales* belong to a novel clade associated with deep subsurface  
410 environments and hot springs that shares only 82-87% nucleotide identities with characterized  
411 *Thermodesulfovibrio* species (**Supplemental Figure S7**). This clade also includes a 16S rRNA  
412 sequence from highly alkaline borehole fluids associated with serpentinization of the Samail  
413 Ophiolite in Oman (Rempfert et al., 2017). *Thermodesulfovibrionales* are not abundant in other  
414 sites of serpentinization, although DsrB sequences with similarity to *Thermodesulfovibrio* were  
415 detected in alkaline borehole fluids from the Coast Range Ophiolite (Sabuda et al., 2020). Sulfate  
416 concentrations are much higher in borehole fluids from the Samail Ophiolite (up to 3.9 mM) and

417 the Coast Range Ophiolite (up to 0.4 mM) compared to most natural springs associated with  
418 serpentinization (e.g. <0.02 mM in the Tablelands, Voltri Massif, and The Cedars) (Brazelton et  
419 al., 2017; Rempfert et al., 2017; Sabuda et al., 2020; Cook et al., 2021). An exception is Ney  
420 Springs, where sulfate can be as high as 12.9 mM, but the potential SRB detected there did not  
421 include *Thermodesulfovibrionales* (Trutschel et al., In Revision).

422

### 423 **H<sub>2</sub>-fueled metabolism is limited to a few taxa in the subseafloor**

424 Lost City fluids contain copious quantities of H<sub>2</sub> (1-7 mM, with subsurface concentrations  
425 predicted to reach 14 mM; (Kelley et al., 2005; Aquino et al., In Revision), which is expected to  
426 be a tremendous boost to life in the subseafloor. Surprisingly, only two taxa  
427 (*Thermodesulfovibrionales* and *Methanosarcinaceae*) that are abundant in Lost City fluids  
428 encode hydrogenases known to be associated with H<sub>2</sub> oxidation. Therefore, the ability of the  
429 subseafloor ecosystem to be powered by H<sub>2</sub> may depend on one species of bacteria and one  
430 species of archaea.

431

432 Another type of hydrogenase, known as membrane-bound hydrogenase (Mbh), was also detected  
433 in *Methanosarcinaceae*, ANME-1, and *Bipolaricaulota* genomes (**Figure 5**). In *Thermococcus*  
434 and *Pyrococcus*, Mbh is responsible for H<sub>2</sub> production during anaerobic, heterotrophic growth,  
435 and some bacteria use Mbh in coordination with FDH to convert formate into H<sub>2</sub> (Schut et al.,  
436 2013; Nobu et al., 2015). In heterotrophic *Bipolaricaulota*, Mbh has been proposed to couple the  
437 production of H<sub>2</sub> with ATP synthesis in coordination with the MvhAGD-HdrABC complex  
438 (Youssef et al., 2019). In methanogens, the role of Mbh is unclear, but each of the methanogens  
439 that encode Mbh can utilize either formate or H<sub>2</sub> as their sole source of electrons. In H<sub>2</sub>-saturated

440 Lost City fluids, biological production of additional H<sub>2</sub> seems highly unfavorable, and the  
441 sequence divergence between the Lost City sequences and these previously characterized Mbh  
442 prevents any firm conclusions on whether they are more likely to catalyze the consumption or  
443 production of H<sub>2</sub>.

444

#### 445 **Formate metabolism may operate via unknown mechanisms in the seafloor**

446 Formate forms abiotically in the high-pH, reducing conditions of serpentinizing fluids, and it is  
447 the second-most abundant form of carbon in Lost City fluids after methane and the second-most  
448 available reductant after dissolved H<sub>2</sub> (Lang & Brazelton, 2020). Much of the biomass in Lost  
449 City chimneys is produced from formate that is derived from carbon originating in Earth's  
450 mantle (Lang et al., 2018). Formate is the preferred substrate for methanogens in at least one  
451 other site of serpentinization where carbon dioxide is limiting (Fones et al., 2021). However,  
452 none of the taxa highlighted by this study contain any known formate transporters, and  
453 surprisingly few encode formate dehydrogenase (FDH), the enzyme that catalyzes the oxidation  
454 of formate. A remarkable exception is *Thermodesulfovibrionales*, which encodes three distinct  
455 forms of FDH.

456

457 A divergent, FDH-like sequence with unknown function was shared by four of the key taxa in  
458 this study (*Thermodesulfovibrionales*, *Methanosarcinacae*, ANME-1, and *Bipolaricaulota*).  
459 These sequences form a distinct clade that includes sequences from continental serpentinite  
460 springs, suggesting that this gene represents a shared, unknown metabolic strategy in  
461 serpentinizing fluids (**Figure 6**).

462

463 In the highly reducing conditions of Lost City fluids, biosynthetic pathways are more  
464 energetically favorable than in typical environments, and the synthesis of some biomolecules can  
465 even be energy-yielding (Amend et al., 2011; Dick & Shock, 2021). Therefore, the ability to  
466 incorporate formate directly into metabolic pathways, rather than first oxidizing it to carbon  
467 dioxide, could be a competitive advantage in Lost City's basement, where formate is 100-1,000  
468 times more abundant than carbon dioxide (Lang & Brazelton, 2020). Potential evidence for this  
469 hypothesis is the prevalence of partial and complete Wood-Ljungdahl pathways among Lost City  
470 bacteria (**Supplemental Table S5**). Eight of these genomes do not encode a known FDH,  
471 suggesting that they may be able to use formate, rather than carbon dioxide, as the substrate for  
472 carbon fixation and perhaps acetogenesis. Some acetogens can use formate as their sole source of  
473 energy and carbon, although FDH may be still required to supply carbon dioxide as an electron  
474 acceptor (Jain et al., 2020).

475

476 In the absence of FDH, pyruvate formate lyase (PflD), which is encoded by some of the same  
477 genomes with partial Wood-Ljungdahl pathways (Bipolaricaulota, NPL-UPA2, and  
478 *Dehalococcoidia*), might catalyze the reduction of formate directly into acetyl-CoA and pyruvate  
479 (Zelcbuch et al., 2016). However, this activity has only been demonstrated in *E. coli*, and its  
480 relevance to these taxa in the unusual environmental conditions of Lost City requires further  
481 research.

482

### 483 **Conclusions**

484 This study has highlighted multiple examples of metabolic strategies shared among the archaea  
485 and bacteria most likely to inhabit subsurface habitats underlying the Lost City hydrothermal

486 field. These shared strategies appear to be advantageous for life in environments that are rich in  
487 H<sub>2</sub> (e.g., hydrogenases), provide a steady supply of simple organic molecules (e.g., formate  
488 dehydrogenase, pyruvate formate lyase, and glycine reductase), lack carbon dioxide (e.g.,  
489 carbonic anhydrase), and make typical ATP synthesis too difficult or unnecessary.

490

491 Many of the predicted proteins associated with these metabolic strategies are not closely related  
492 to any previously characterized enzymes, but they are shared by diverse archaea and bacteria in  
493 Lost City and other sites of serpentinization (e.g., Prony Bay, The Cedars, Hakuba Happo, and  
494 Voltri Massif), strongly suggesting the influence of horizontal gene transfer among these  
495 systems. The functions of these proteins are mostly unknown and require further study, but the  
496 results presented here indicate that they are likely to be important clues for understanding the  
497 ecology, physiology, and evolution of microbes adapted to these conditions.

498

499 If potential extraterrestrial habitats are evaluated for their ability to support a robust ecosystem  
500 over geological time scales (Cabrol, 2018), then it is critical to identify and understand the  
501 metabolic pathways of key organisms that form the foundations of ecosystems that are  
502 potentially relevant for astrobiology. All ecosystems on the surface of the Earth are based on  
503 autotrophs that rely on the availability of sunlight and carbon dioxide. The most promising  
504 extraterrestrial habitats in our solar system (Schulte et al., 2006; Waite et al., 2017; Jones,  
505 Goordial & Orcutt, 2018; Michalski et al., 2018), however, are dark, rock-hosted environments  
506 where simple organic molecules may be more biologically available than carbon dioxide. The  
507 organisms and metabolic pathways highlighted by this study can help us to understand the  
508 biological advantages and limitations of such conditions.

509

## 510 **METHODS**

### 511 **Collection of hydrothermal fluid samples**

512 Hydrothermal fluid samples were collected from actively venting chimneys at the Lost City  
513 hydrothermal field (**Figure 1**) using ROV *Jason* during the 2018 Lost City expedition aboard  
514 R/V *Atlantis* (AT42-01). On the seafloor, venting fluids were slowly pumped through 0.2 µm  
515 Millipore Sterivex cartridge filters or into acid-washed Kynar bags with the HOG sampler (Lang  
516 & Benitez-Nelson, 2021). Samples intended for RNA extractions were collected into 2 L Kynar  
517 bags containing 67 mL of a stop solution (97.5% 200 proof ethanol, 2.5% Trizol LS; Thermo  
518 Fisher). Fluid temperatures were monitored in real-time during sampling with a probe embedded  
519 into the sampler intake. Concentrations of sulfate, hydrogen sulfide, and magnesium were  
520 measured according to standard methods (Butterfield & Massoth, 1994). Additional sampling  
521 methods are provided in the **Supplemental Material**.

522

### 523 **Sequencing of DNA and RNA**

524 Extraction of DNA and RNA from Sterivex filters was conducted as described previously  
525 (Brazelton et al., 2017; Thornton et al., 2020), with minor modifications described in the  
526 **Supplemental Material**. Sequencing of amplicons generated from 16S rRNA genes and cDNA  
527 was performed at the Genomics Core Facility at Michigan State University on an Illumina MiSeq  
528 instrument using dual-indexed Illumina fusion primers targeting the V4 region of the 16S rRNA  
529 gene (Kozich et al., 2013). Amplicon sequence variants (ASVs) were inferred from 16S rRNA  
530 amplicon sequences with DADA2 v. 1.10.1 (Callahan et al., 2016). Paired-end sequencing (2 x  
531 125 bp) of metagenomic libraries was conducted at the University of Utah High-Throughput

532 Genomics Core Facility at the Huntsman Cancer Institute with an Illumina HiSeq2500 platform.  
533 Metatranscriptome sequencing was conducted with a 150 cycle paired-end run on a NovaSeq  
534 6000. Methods for the assembly and binning of metagenomes, including all downstream analyses  
535 are provided in the **Supplemental Material**.

536

#### 537 **Data Availability**

538 Amplicon sequences are available via NCBI BioProject PRJNA672129, and metagenome and  
539 metatranscriptome sequences are available via BioProject PRJNA779602. MAGs are associated  
540 with the same BioProject and are individually accessible via BioSamples SAMN23474158 -  
541 SAMN23474187. In addition, GenBank accessions are listed for each MAG in **Supplemental**  
542 **Table S4**. Protocols, metadata, and additional data are provided in a Zenodo-archived GitHub  
543 repository accessible via DOI: 10.5281/zenodo.5798015, and on the BCO-DMO page for project  
544 658604: <https://www.bco-dmo.org/award/658604>.

545

#### 546 **Acknowledgements**

547 We thank the Scientific Party of the 2018 Lost City expedition (AT42-01), including the crews  
548 of R/V *Atlantis* and ROV *Jason*. In addition, we gratefully acknowledge invaluable mentorship  
549 for many years from John Baross and Deborah Kelley. Mitch Elend, Christopher Thornton, and  
550 Alex Hyer provided critical technical support before, during, and after the expedition. University  
551 of Utah students enrolled in BIOL 3270 / 5270 assisted in the analysis of metagenomic data.

552



553 This work was supported by NSF awards to Brazelton and Lang (OCE-1536702/1536405), the  
554 NASA Astrobiology Institute Rock-Powered Life team, a NASA Postdoctoral fellowship to  
555 McGonigle, the Swiss National Science Foundation, and the Deep Carbon Observatory.

556

## 557 **References**

558 Amend JP, McCollom TM, Hentscher M, Bach W. 2011. Catabolic and anabolic energy for  
559 chemolithoautotrophs in deep-sea hydrothermal systems hosted in different rock types.

560 *Geochimica et Cosmochimica Acta* 75:5736–5748. DOI: 10.1016/j.gca.2011.07.041.

561 Amend JP, Shock EL. 1998. Energetics of Amino Acid Synthesis in Hydrothermal Ecosystems.

562 *Science* 281:1659–1662. DOI: 10.1126/science.281.5383.1659.

563 Andreesen JR. 2004. Glycine reductase mechanism. *Current Opinion in Chemical Biology*

564 8:454–461. DOI: 10.1016/j.cbpa.2004.08.002.

565 Aquino KA, Früh-Green GL, Rickli J, Bernasconi SM, Lang SQ, Lilley MD, Butterfield DA. In

566 Revision. Multi-stage evolution of the Lost City hydrothermal vent fluids. *Geochimica et*

567 *Cosmochimica Acta*.

568 Aubrey AD, Cleaves HJ, Bada JL. 2009. The role of submarine hydrothermal systems in the

569 synthesis of amino acids. *Origins of Life and Evolution of Biospheres* 39:91–108.

570 Bowers RM, Kyrpidis NC, Stepanauskas R, Harmon-Smith M, Doud D, Reddy TBK, Schulz F,

571 Jarett J, Rivers AR, Eloe-Fadrosch EA, Tringe SG, Ivanova NN, Copeland A, Clum A,

572 Becraft ED, Malmstrom RR, Birren B, Podar M, Bork P, Weinstock GM, Garrity GM,

573 Dodsworth JA, Yooseph S, Sutton G, Glöckner FO, Gilbert JA, Nelson WC, Hallam SJ,

574 Jungbluth SP, Ettema TJG, Tighe S, Konstantinidis KT, Liu W-T, Baker BJ, Rattei T,

575 Eisen JA, Hedlund B, McMahon KD, Fierer N, Knight R, Finn R, Cochrane G, Karsch-

576 Mizrachi I, Tyson GW, Rinke C, Lapidus A, Meyer F, Yilmaz P, Parks DH, Murat Eren A,

577 Schriml L, Banfield JF, Hugenholtz P, Woyke T. 2017. Minimum information about a

578 single amplified genome (MISAG) and a metagenome-assembled genome (MIMAG) of  
579 bacteria and archaea. *Nature Biotechnology* 35:725–731. DOI: 10.1038/nbt.3893.

580 Brazelton WJ, Baross JA. 2010. Metagenomic Comparison of Two *Thiomicrospira* Lineages  
581 Inhabiting Contrasting Deep-Sea Hydrothermal Environments. *PLoS ONE* 5:e13530.  
582 DOI: 10.1371/journal.pone.0013530.

583 Brazelton WJ, Ludwig KA, Sogin ML, Andreishcheva EN, Kelley DS, Shen C-C, Edwards RL,  
584 Baross JA. 2010. Archaea and bacteria with surprising microdiversity show shifts in  
585 dominance over 1,000-year time scales in hydrothermal chimneys. *Proceedings of the*  
586 *National Academy of Sciences* 107:1612–1617. DOI: 10.1073/pnas.0905369107.

587 Brazelton WJ, Mehta MP, Kelley DS, Baross JA. 2011. Physiological Differentiation within a  
588 Single-Species Biofilm Fueled by Serpentinization. *mBio* 2:e00127-11. DOI:  
589 10.1128/mBio.00127-11.

590 Brazelton WJ, Nelson B, Schrenk MO. 2012. Metagenomic Evidence for H<sub>2</sub> Oxidation and H<sub>2</sub>  
591 Production by Serpentinite-Hosted Subsurface Microbial Communities. *Frontiers in*  
592 *Microbiology* 2:268. DOI: 10.3389/fmicb.2011.00268.

593 Brazelton WJ, Schrenk MO, Kelley DS, Baross JA. 2006. Methane- and Sulfur-Metabolizing  
594 Microbial Communities Dominate the Lost City Hydrothermal Field Ecosystem. *Applied*  
595 *and Environmental Microbiology* 72:6257–6270. DOI: 10.1128/AEM.00574-06.

596 Brazelton WJ, Thornton CN, Hyer A, Twing KI, Longino AA, Lang SQ, Lilley MD, Früh-Green  
597 GL, Schrenk MO. 2017. Metagenomic identification of active methanogens and  
598 methanotrophs in serpentinite springs of the Voltri Massif, Italy. *PeerJ* 5:e2945. DOI:  
599 10.7717/peerj.2945.

600 Butterfield DA, Massoth GJ. 1994. Geochemistry of north Cleft segment vent fluids: temporal  
601 changes in chlorinity and their possible relation to recent volcanism. *Journal of*  
602 *Geophysical Research* 99:4951–4968. DOI: 10.1029/93JB02798.

- 603 Cabrol NA. 2018. The Coevolution of Life and Environment on Mars: An Ecosystem Perspective  
604 on the Robotic Exploration of Biosignatures. *Astrobiology* 18:1–27. DOI:  
605 10.1089/ast.2017.1756.
- 606 Callahan BJ, McMurdie PJ, Rosen MJ, Han AW, Johnson AJA, Holmes SP. 2016. DADA2:  
607 High-resolution sample inference from Illumina amplicon data. *Nature Methods* 13:581–  
608 583. DOI: 10.1038/nmeth.3869.
- 609 Chadwick GL, Skennerton CT, Laso-Pérez R, Leu AO, Speth DR, Yu H, Morgan-Lang C,  
610 Hatzenpichler R, Goudeau D, Malmstrom R, Brazelton WJ, Woyke T, Hallam SJ, Tyson  
611 GW, Wegener G, Boetius A, Orphan VJ. 2021. *Comparative genomics reveals electron*  
612 *transfer and syntrophic mechanisms differentiating methanotrophic and methanogenic*  
613 *archaea*. DOI: 10.1101/2021.09.25.461819.
- 614 Cook MC, Blank JG, Rietze A, Suzuki S, Neelson KH, Morrill PL. 2021. A Geochemical  
615 Comparison of Three Terrestrial Sites of Serpentinization: The Tablelands, the Cedars,  
616 and Aqua de Ney. *Journal of Geophysical Research: Biogeosciences*  
617 126:e2021JG006316. DOI: 10.1029/2021JG006316.
- 618 Costa KC, Lie TJ, Xia Q, Leigh JA. 2013. VhuD Facilitates Electron Flow from H<sub>2</sub> or Formate to  
619 Heterodisulfide Reductase in *Methanococcus maripaludis*. *Journal of Bacteriology*  
620 195:5160–5165. DOI: 10.1128/JB.00895-13.
- 621 Dick JM, Shock EL. 2021. The Release of Energy During Protein Synthesis at Ultramafic-  
622 Hosted Submarine Hydrothermal Ecosystems. *Journal of Geophysical Research:*  
623 *Biogeosciences* 126:e2021JG006436. DOI: 10.1029/2021JG006436.
- 624 Dombrowski N, Teske AP, Baker BJ. 2018. Expansive microbial metabolic versatility and  
625 biodiversity in dynamic Guaymas Basin hydrothermal sediments. *Nature*  
626 *Communications* 9:4999. DOI: 10.1038/s41467-018-07418-0.
- 627 Fones EM, Colman DR, Kraus EA, Stepanauskas R, Templeton AS, Spear JR, Boyd ES. 2021.  
628 Diversification of methanogens into hyperalkaline serpentinizing environments through

- 629 adaptations to minimize oxidant limitation. *The ISME Journal* 15:1121–1135. DOI:  
630 10.1038/s41396-020-00838-1.
- 631 Früh-Green GL, Orcutt BN, Rouméjon S, Lilley MD, Morono Y, Cotterill C, Green S, Escartin J,  
632 John BE, McCaig AM. 2018. Magmatism, serpentinization and life: Insights through  
633 drilling the Atlantis Massif (IODP Expedition 357). *Lithos* 323:137–155.
- 634 Gerasimchuk AL, Shatalov AA, Novikov AL, Butorova OP, Pimenov NV, Lein AYU, Yanenko AS,  
635 Karnachuk OV. 2010. The search for sulfate-reducing bacteria in mat samples from the  
636 lost city hydrothermal field by molecular cloning. *Microbiology* 79:96–105. DOI:  
637 10.1134/S0026261710010133.
- 638 Imachi H, Sekiguchi Y, Kamagata Y, Loy A, Qiu Y-L, Hugenholtz P, Kimura N, Wagner M,  
639 Ohashi A, Harada H. 2006. Non-Sulfate-Reducing, Syntrophic Bacteria Affiliated with  
640 Desulfotomaculum Cluster I Are Widely Distributed in Methanogenic Environments.  
641 *Applied and Environmental Microbiology* 72:2080–2091. DOI: 10.1128/AEM.72.3.2080-  
642 2091.2006.
- 643 Jain S, Dietrich HM, Müller V, Basen M. 2020. Formate Is Required for Growth of the  
644 Thermophilic Acetogenic Bacterium *Thermoanaerobacter kivui* Lacking Hydrogen-  
645 Dependent Carbon Dioxide Reductase (HDCR). *Frontiers in Microbiology* 11:59. DOI:  
646 10.3389/fmicb.2020.00059.
- 647 Jones RM, Goordial JM, Orcutt BN. 2018. Low Energy Subsurface Environments as  
648 Extraterrestrial Analogs. *Frontiers in Microbiology* 9:1605. DOI:  
649 10.3389/fmicb.2018.01605.
- 650 Karson JA, Früh-Green GL, Kelley DS, Williams EA, Yoerger DR, Jakuba M. 2006. Detachment  
651 shear zone of the Atlantis Massif core complex, Mid-Atlantic Ridge, 30°N. *Geochemistry,*  
652 *Geophysics, Geosystems* 7. DOI: 10.1029/2005GC001109.

- 653 Kelley DS, Früh-Green GL. 1999. Abiogenic methane in deep-seated mid-ocean ridge  
654 environments: Insights from stable isotope analyses. *Journal of Geophysical Research:*  
655 *Solid Earth* 104:10439–10460. DOI: 10.1029/1999JB900058.
- 656 Kelley DS, Karson JA, Früh-Green GL, Yoerger DR, Shank TM, Butterfield DA, Hayes JM,  
657 Schrenk MO, Olson EJ, Proskurowski G, Jakuba M, Bradley A, Larson B, Ludwig K,  
658 Glickson D, Buckman K, Bradley AS, Brazelton WJ, Roe K, Elend MJ, Delacour A,  
659 Bernasconi SM, Lilley MD, Baross JA, Summons RE, Sylva SP. 2005. A Serpentinite-  
660 Hosted Ecosystem: The Lost City Hydrothermal Field. *Science* 307:1428–1434. DOI:  
661 10.1126/science.1102556.
- 662 Klein F, Grozeva NG, Seewald JS. 2019. Abiotic methane synthesis and serpentinization in  
663 olivine-hosted fluid inclusions. *Proceedings of the National Academy of Sciences*  
664 116:17666–17672. DOI: 10.1073/pnas.1907871116.
- 665 Kohl L, Cumming E, Cox A, Rietze A, Morrissey L, Lang SQ, Richter A, Suzuki S, Nealson KH,  
666 Morrill PL. 2016. Exploring the metabolic potential of microbial communities in ultra-  
667 basic, reducing springs at The Cedars, CA, USA: Experimental evidence of microbial  
668 methanogenesis and heterotrophic acetogenesis. *Journal of Geophysical Research:*  
669 *Biogeosciences* 121:1203–1220. DOI: 10.1002/2015JG003233.
- 670 Kozich JJ, Westcott SL, Baxter NT, Highlander SK, Schloss PD. 2013. Development of a Dual-  
671 Index Sequencing Strategy and Curation Pipeline for Analyzing Amplicon Sequence  
672 Data on the MiSeq Illumina Sequencing Platform. *Applied and Environmental*  
673 *Microbiology* 79:5112–5120. DOI: 10.1128/AEM.01043-13.
- 674 Kpebe A, Benvenuti M, Guendon C, Rebai A, Fernandez V, Le Laz S, Etienne E, Guigliarelli B,  
675 García-Molina G, de Lacey AL, Baffert C, Brugna M. 2018. A new mechanistic model for  
676 an O<sub>2</sub>-protected electron-bifurcating hydrogenase, Hnd from *Desulfovibrio*  
677 *fructosovorans*. *Biochimica et Biophysica Acta (BBA) - Bioenergetics* 1859:1302–1312.  
678 DOI: 10.1016/j.bbabi.2018.09.364.

- 679 Kraus EA, Nothaft D, Stamps BW, Rempfert KR, Ellison ET, Matter JM, Templeton AS, Boyd  
680 ES, Spear JR. 2021. Molecular Evidence for an Active Microbial Methane Cycle in  
681 Subsurface Serpentinite-Hosted Groundwaters in the Samail Ophiolite, Oman. *Applied*  
682 *and Environmental Microbiology* 87:e02068-20. DOI: 10.1128/AEM.02068-20.
- 683 Labidi J, Young ED, Giunta T, Kohl IE, Seewald J, Tang H, Lilley MD, Früh-Green GL. 2020.  
684 Methane thermometry in deep-sea hydrothermal systems: Evidence for re-ordering of  
685 doubly-substituted isotopologues during fluid cooling. *Geochimica et Cosmochimica Acta*  
686 288:248–261. DOI: 10.1016/j.gca.2020.08.013.
- 687 Lang SQ, Benitez-Nelson B. 2021. Hydrothermal Organic Geochemistry (HOG) sampler for  
688 deployment on deep-sea submersibles. *Deep Sea Research Part I: Oceanographic*  
689 *Research Papers* 173:103529. DOI: 10.1016/j.dsr.2021.103529.
- 690 Lang SQ, Brazelton WJ. 2020. Habitability of the marine serpentinite subsurface: a case study  
691 of the Lost City hydrothermal field. *Philosophical Transactions of the Royal Society A:*  
692 *Mathematical, Physical and Engineering Sciences* 378:20180429. DOI:  
693 10.1098/rsta.2018.0429.
- 694 Lang SQ, Früh-Green GL, Bernasconi SM, Brazelton WJ, Schrenk MO, McGonigle JM. 2018.  
695 Deeply-sourced formate fuels sulfate reducers but not methanogens at Lost City  
696 hydrothermal field. *Scientific Reports* 8:755. DOI: 10.1038/s41598-017-19002-5.
- 697 Lang SQ, Früh-Green GL, Bernasconi SM, Butterfield DA. 2013. Sources of organic nitrogen at  
698 the serpentinite-hosted Lost City hydrothermal field. *Geobiology* 11:154–169. DOI:  
699 10.1111/gbi.12026.
- 700 Lang SQ, Früh-Green GL, Bernasconi SM, Lilley MD, Proskurowski G, Méhay S, Butterfield DA.  
701 2012. Microbial utilization of abiogenic carbon and hydrogen in a serpentinite-hosted  
702 system. *Geochimica et Cosmochimica Acta* 92:82–99.

- 703 Lang SQ, Lilley MD, Baumberger T, Früh-Green GL, Walker SL, Brazelton WJ, Kelley DS,  
704 Elend M, Butterfield DA, Mau AJ. 2021. Extensive decentralized hydrogen export from  
705 the Atlantis Massif. *Geology* 49. DOI: 10.1130/G48322.1.
- 706 Maia LB, Moura JGG, Moura I. 2015. Molybdenum and tungsten-dependent formate  
707 dehydrogenases. *JBIC Journal of Biological Inorganic Chemistry* 20:287–309. DOI:  
708 10.1007/s00775-014-1218-2.
- 709 Martin W, Baross J, Kelley D, Russell MJ. 2008. Hydrothermal vents and the origin of life.  
710 *Nature Reviews Microbiology* 6:805–814. DOI: 10.1038/nrmicro1991.
- 711 McCollom TM, Seewald JS. 2007. Abiotic Synthesis of Organic Compounds in Deep-Sea  
712 Hydrothermal Environments. *Chemical Reviews* 107:382–401. DOI: 10.1021/cr0503660.
- 713 McGonigle JM, Lang SQ, Brazelton WJ. 2020. Genomic Evidence for Formate Metabolism by  
714 *Chloroflexi* as the Key to Unlocking Deep Carbon in Lost City Microbial Ecosystems.  
715 *Applied and Environmental Microbiology* 86:e02583-19. DOI: 10.1128/AEM.02583-19.
- 716 Mei N, Postec A, Erauso G, Joseph M, Pelletier B, Payri C, Ollivier B, Quéméneur M. 2016.  
717 *Serpentinicella alkaliphila* gen. nov., sp. nov., a novel alkaliphilic anaerobic bacterium  
718 isolated from the serpentinite-hosted Prony hydrothermal field, New Caledonia.  
719 *International Journal of Systematic and Evolutionary Microbiology* 66:4464–4470. DOI:  
720 10.1099/ijsem.0.001375.
- 721 Merino N, Kawai M, Boyd ES, Colman DR, McGlynn SE, Neelson KH, Kurokawa K, Hongoh Y.  
722 2020. Single-Cell Genomics of Novel Actinobacteria With the Wood–Ljungdahl Pathway  
723 Discovered in a Serpentinizing System. *Frontiers in Microbiology* 11:1031. DOI:  
724 10.3389/fmicb.2020.01031.
- 725 Michalski JR, Onstott TC, Mojzsis SJ, Mustard J, Chan QHS, Niles PB, Johnson SS. 2018. The  
726 Martian subsurface as a potential window into the origin of life. *Nature Geoscience*  
727 11:21–26. DOI: 10.1038/s41561-017-0015-2.

- 728 Miller HM, Chaudhry N, Conrad ME, Bill M, Kopf SH, Templeton AS. 2018. Large carbon  
729 isotope variability during methanogenesis under alkaline conditions. *Geochimica et*  
730 *Cosmochimica Acta* 237:18–31. DOI: 10.1016/j.gca.2018.06.007.
- 731 Moore WS, Frankle JD, Benitez-Nelson CR, Früh-Green GL, Lang SQ. 2021. Activities of  
732 <sup>223</sup>Ra and <sup>226</sup>Ra in Fluids From the Lost City Hydrothermal Field Require Short Fluid  
733 Residence Times. *Journal of Geophysical Research: Oceans* 126:e2021JC017886. DOI:  
734 10.1029/2021JC017886.
- 735 Motamedi S, Orcutt BN, Früh-Green GL, Twing KI, Pendleton HL, Brazelton WJ. 2020. Microbial  
736 Residents of the Atlantis Massif's Shallow Serpentinite Subsurface. *Applied and*  
737 *Environmental Microbiology* 86:e00356-20. DOI: 10.1128/AEM.00356-20.
- 738 Müller V, Grüber G. 2003. ATP synthases: structure, function and evolution of unique energy  
739 converters. *Cellular and Molecular Life Sciences CMLS* 60:474–494. DOI:  
740 10.1007/s000180300040.
- 741 Nobu MK, Nakai R, Tamazawa S, Mori H, Toyoda A, Ijiri A, Suzuki S, Kurokawa K, Kamagata  
742 Y, Tamaki H. 2021. *Unique metabolic strategies in Hadean analogues reveal hints for*  
743 *primordial physiology*. DOI: 10.1101/2021.04.20.440570.
- 744 Nobu MK, Narihiro T, Rinke C, Kamagata Y, Tringe SG, Woyke T, Liu W-T. 2015. Microbial dark  
745 matter ecogenomics reveals complex synergistic networks in a methanogenic bioreactor.  
746 *The ISME Journal* 9:1710–1722. DOI: 10.1038/ismej.2014.256.
- 747 Postec A, Quéméneur M, Lecoivre A, Chabert N, Joseph M, Erauso G. 2021. *Alkaliphilus*  
748 *serpentinus* sp. nov. and *Alkaliphilus pronyensis* sp. nov., two novel anaerobic  
749 alkaliphilic species isolated from the serpentinite-hosted Prony Bay Hydrothermal Field  
750 (New Caledonia). *Systematic and Applied Microbiology* 44:126175. DOI:  
751 10.1016/j.syapm.2020.126175.



- 752 Proskurowski G, Lilley MD, Seewald JS, Fru h-Green GL, Olson EJ, Lupton JE, Sylva SP,  
753 Kelley DS. 2008. Abiogenic Hydrocarbon Production at Lost City Hydrothermal Field.  
754 *Science* 319:604–607. DOI: 10.1126/science.1151194.
- 755 Rempfert KR, Miller HM, Bompard N, Nothaft D, Matter JM, Kelemen P, Fierer N, Templeton  
756 AS. 2017. Geological and Geochemical Controls on Subsurface Microbial Life in the  
757 Samail Ophiolite, Oman. *Frontiers in Microbiology* 8:56. DOI: 10.3389/fmicb.2017.00056.
- 758 Sabuda MC, Brazelton WJ, Putman LI, McCollom TM, Hoehler TM, Kubo MDY, Cardace D,  
759 Schrenk MO. 2020. A dynamic microbial sulfur cycle in a serpentinizing continental  
760 ophiolite. *Environmental Microbiology* 22:2329–2345. DOI: 10.1111/1462-2920.15006.
- 761 Sánchez-Andrea I, Guedes IA, Hornung B, Boeren S, Lawson CE, Sousa DZ, Bar-Even A,  
762 Claassens NJ, Stams AJM. 2020. The reductive glycine pathway allows autotrophic  
763 growth of *Desulfovibrio desulfuricans*. *Nature Communications* 11:5090. DOI:  
764 10.1038/s41467-020-18906-7.
- 765 Schrenk MO, Kelley DS, Bolton SA, Baross JA. 2004. Low archaeal diversity linked to  
766 subseafloor geochemical processes at the Lost City Hydrothermal Field, Mid-Atlantic  
767 Ridge. *Environmental Microbiology* 6:1086–1095. DOI: 10.1111/j.1462-  
768 2920.2004.00650.x.
- 769 Schulte M, Blake D, Hoehler T, McCollom T. 2006. Serpentinization and Its Implications for Life  
770 on the Early Earth and Mars. *Astrobiology* 6:364–376. DOI: 10.1089/ast.2006.6.364.
- 771 Schut GJ, Boyd ES, Peters JW, Adams MWW. 2013. The modular respiratory complexes  
772 involved in hydrogen and sulfur metabolism by heterotrophic hyperthermophilic archaea  
773 and their evolutionary implications. *FEMS Microbiology Reviews* 37:182–203. DOI:  
774 10.1111/j.1574-6976.2012.00346.x.
- 775 Scott KM, Williams J, Porter CMB, Russel S, Harmer TL, Paul JH, Antonen KM, Bridges MK,  
776 Camper GJ, Campla CK, Casella LG, Chase E, Conrad JW, Cruz MC, Dunlap DS,  
777 Duran L, Fahsbender EM, Goldsmith DB, Keeley RF, Kondoff MR, Kussy BI, Lane MK,

778 Lawler S, Leigh BA, Lewis C, Lostal LM, Marking D, Mancera PA, McClenathan EC,  
779 McIntyre EA, Mine JA, Modi S, Moore BD, Morgan WA, Nelson KM, Nguyen KN, Ogburn  
780 N, Parrino DG, Pedapudi AD, Pelham RP, Preece AM, Rampersad EA, Richardson JC,  
781 Rodgers CM, Schaffer BL, Sheridan NE, Solone MR, Staley ZR, Tabuchi M, Waide RJ,  
782 Wanjugi PW, Young S, Clum A, Daum C, Huntemann M, Ivanova N, Kyrpides N,  
783 Mikhailova N, Palaniappan K, Pillay M, Reddy TBK, Shapiro N, Stamatis D, Varghese N,  
784 Woyke T, Boden R, Freyermuth SK, Kerfeld CA. 2018. Genomes of ubiquitous marine  
785 and hypersaline *Hydrogenovibrio*, *Thiomicrothabodus* and *Thiomicrospira* spp. encode a  
786 diversity of mechanisms to sustain chemolithoautotrophy in heterogeneous  
787 environments: *Hydrogenovibrio*, *Thiomicrothabodus*, *Thiomicrospira*. *Environmental*  
788 *Microbiology* 20:2686–2708. DOI: 10.1111/1462-2920.14090.

789 Smith KS, Ferry JG. 2000. Prokaryotic carbonic anhydrases. *FEMS Microbiology Reviews*  
790 24:335–366. DOI: 10.1111/j.1574-6976.2000.tb00546.x.

791 Suzuki S, Ishii S, Hoshino T, Rietze A, Tenney A, Morrill PL, Inagaki F, Kuenen JG, Nealson  
792 KH. 2017. Unusual metabolic diversity of hyperalkaliphilic microbial communities  
793 associated with subterranean serpentinization at The Cedars. *The ISME Journal*  
794 11:2584–2598. DOI: 10.1038/ismej.2017.111.

795 Suzuki S, Kuenen JG, Schipper K, van der Velde S, Ishii S, Wu A, Sorokin DY, Tenney A, Meng  
796 X, Morrill PL, Kamagata Y, Muyzer G, Nealson KH. 2014. Physiological and genomic  
797 features of highly alkaliphilic hydrogen-utilizing Betaproteobacteria from a continental  
798 serpentinizing site. *Nature Communications* 5:3900. DOI: 10.1038/ncomms4900.

799 Suzuki S, Nealson KH, Ishii S. 2018. Genomic and in-situ Transcriptomic Characterization of the  
800 Candidate Phylum NPL-UPL2 From Highly Alkaline Highly Reducing Serpentinized  
801 Groundwater. *Frontiers in Microbiology* 9:3141. DOI: 10.3389/fmicb.2018.03141.

- 802 Ternieten L, Früh-Green GL, Bernasconi SM. 2021. Distribution and Sources of Carbon in  
803 Serpentinized Mantle Peridotites at the Atlantis Massif (IODP Expedition 357). *Journal of*  
804 *Geophysical Research: Solid Earth* 126:e2021JB021973. DOI: 10.1029/2021JB021973.
- 805 Thauer RK, Kaster A-K, Goenrich M, Schick M, Hiromoto T, Shima S. 2010. Hydrogenases from  
806 Methanogenic Archaea, Nickel, a Novel Cofactor, and H<sub>2</sub> Storage. *Annual Review of*  
807 *Biochemistry* 79:507–536. DOI: 10.1146/annurev.biochem.030508.152103.
- 808 Thornton CN, Tanner WD, VanDerslice JA, Brazelton WJ. 2020. Localized effect of treated  
809 wastewater effluent on the resistome of an urban watershed. *GigaScience* 9. DOI:  
810 10.1093/gigascience/giaa125.
- 811 Trutschel LR, Chadwick GL, Kruger B, Blank JG, Brazelton WJ, Dart ER, Rowe AR. In Revision.  
812 Microbial sulfur oxidation in an extremely high pH marine-like terrestrial serpentinizing  
813 system: Ney Springs. *Science of The Total Environment*.
- 814 Vekeman B, Kerckhof F-M, Cremers G, de Vos P, Vandamme P, Boon N, Op den Camp HJM,  
815 Heylen K. 2016. New Methyloceanibacter diversity from North Sea sediments includes  
816 methanotroph containing solely the soluble methane monooxygenase. *Environmental*  
817 *Microbiology* 18:4523–4536. DOI: 10.1111/1462-2920.13485.
- 818 Waite JH, Glein CR, Perryman RS, Teolis BD, Magee BA, Miller G, Grimes J, Perry ME, Miller  
819 KE, Bouquet A, Lunine JI, Brockwell T, Bolton SJ. 2017. Cassini finds molecular  
820 hydrogen in the Enceladus plume: Evidence for hydrothermal processes. *Science*  
821 356:155–159. DOI: 10.1126/science.aai8703.
- 822 Wang DT, Reeves EP, McDermott JM, Seewald JS, Ono S. 2018. Clumped isotopologue  
823 constraints on the origin of methane at seafloor hot springs. *Geochimica et*  
824 *Cosmochimica Acta* 223:141–158. DOI: 10.1016/j.gca.2017.11.030.
- 825 Youssef NH, Farag IF, Rudy S, Mulliner A, Walker K, Caldwell F, Miller M, Hoff W, Elshahed M.  
826 2019. The Wood–Ljungdahl pathway as a key component of metabolic versatility in

827 candidate phylum Bipolaricaulota (Acetothermia, OP1). *Environmental Microbiology*  
828 *Reports* 11:538–547. DOI: 10.1111/1758-2229.12753.

829 Zelcbuch L, Lindner SN, Zegman Y, Vainberg Slutskin I, Antonovsky N, Gleizer S, Milo R, Bar-  
830 Even A. 2016. Pyruvate Formate-Lyase Enables Efficient Growth of *Escherichia coli* on  
831 Acetate and Formate. *Biochemistry* 55:2423–2426. DOI: 10.1021/acs.biochem.6b00184.

832 Zhou Z, Liu Y, Pan J, Cron BR, Toner BM, Anantharaman K, Breier JA, Dick GJ, Li M. 2020.  
833 Gammaproteobacteria mediating utilization of methyl-, sulfur- and petroleum organic  
834 compounds in deep ocean hydrothermal plumes. *The ISME journal* 14:3136–3148. DOI:  
835 10.1038/s41396-020-00745-5.

836

## Tables and Figures

### Brazelton et al. “Metabolic strategies shared by basement residents of the Lost City hydrothermal field”

#### Tables

1. Sample overview including temp and chemistry

#### Figures

1. Map and ordination
2. 16S bubbles
3. MAG bubbles
4. MAG presence/absence of key genes
5. MBH phylogeny
6. FDH phylogeny
7. Key gene bubbles

#### Supplemental Figures

1. Extended map figure
2. Chimney photos
3. Metagenome analysis workflow
4. Kaiju bubbles
5. Phylogeny – Methanosarcinales 16S + mcrA
6. Phylogeny – Bipolaricaulota 16S
7. Phylogeny – Thermodesulfobirionales 16S
8. Phylogeny + gene order mbhL
9. Phylogeny + gene order FDH
10. Phylogeny – carbonic anhydrase
11. Phylogeny – GrdB
12. Hydrogenase bubbles
13. Acetate/formate bubbles
14. Methanogenesis bubbles
15. Acetogenesis bubbles

#### Supplemental Tables (Excel files)

1. Sample info
2. Full 16S count table including contaminants
3. Kaiju tables
4. MAG taxonomy, completeness, coverage table
5. MAG gene presence absence tables
6. MAG annotations for transporters, dbCAN, FeGenie
7. KO coverage table
8. Incubation experiment results

#### Github Repo

1. Protocols
2. Kaiju Krona plots
3. NCBI SRA and GenBank metadata
4. MAG sequences and annotations
5. Alignments and sequences for phylogenetic trees
6. R code for plots
7. Python scripts for metagenomic analyses

| <i>Chimney location</i> | <i>Meta-genome libraries</i> | <i>Meta-transcriptome libraries</i> | <i>16S rRNA amplicon libraries (DNA)</i> | <i>16S rRNA amplicon libraries (RNA)</i> | <i>Cells per mL</i>   | <i>Max T (°C)</i> | <i>pH</i> | <i>Sulfide (mmol/kg)</i> | <i>Sulfate (mmol/kg)</i> | <i>Mg (mmol/kg)</i> |
|-------------------------|------------------------------|-------------------------------------|------------------------------------------|------------------------------------------|-----------------------|-------------------|-----------|--------------------------|--------------------------|---------------------|
| <i>Camel Humps</i>      | 2                            | 0                                   | 4                                        | 0                                        | 4.3 x 10 <sup>4</sup> | 41                | 8.1       | 0.02                     | 24                       | 47                  |
| <i>Sombrero1</i>        | 3                            | 1                                   | 7                                        | 1                                        | 5.9 x 10 <sup>4</sup> | 13                | 8.0       | 0.002                    | 27                       | 54                  |
| <i>Sombrero2</i>        | 2                            | 0                                   | 6                                        | 1                                        | 6.3 x 10 <sup>4</sup> | 52                | 8.7       | 0.12                     | 18                       | 36                  |
| <i>Marker 3</i>         | 2                            | 0                                   | 6                                        | 0                                        | 6.3 x 10 <sup>4</sup> | 21                | 8.6       | 0.20                     | 23                       | 45                  |
| <i>Marker C</i>         | 0                            | 0                                   | 1                                        | 1                                        | 3.8 x 10 <sup>4</sup> | 80                | 10.1      | 0.39                     | 16                       | 31                  |
| <i>Calypso</i>          | 2                            | 0                                   | 6                                        | 1                                        | 4.8 x 10 <sup>4</sup> | 24                | 9.3       | 1.3                      | 15                       | 30                  |
| <i>Marker 2</i>         | 2                            | 1                                   | 3                                        | 1                                        | 2.6 x 10 <sup>4</sup> | 58                | 9.5       | 1.8                      | 8                        | 15                  |
| <i>Marker 8</i>         | 0                            | 0                                   | 1                                        | 0                                        | 7.5 x 10 <sup>4</sup> | 42                | 9.9       | 1.8                      | 9                        | 19                  |

**Table 1.** Overview of hydrothermal fluid samples collected from Lost City chimneys. Cell numbers are the median of all samples collected from that location. Temperatures and chemistry values are reported for one representative sample collected from that location, typically the sample for which the most chemistry and/or sequence data was available.

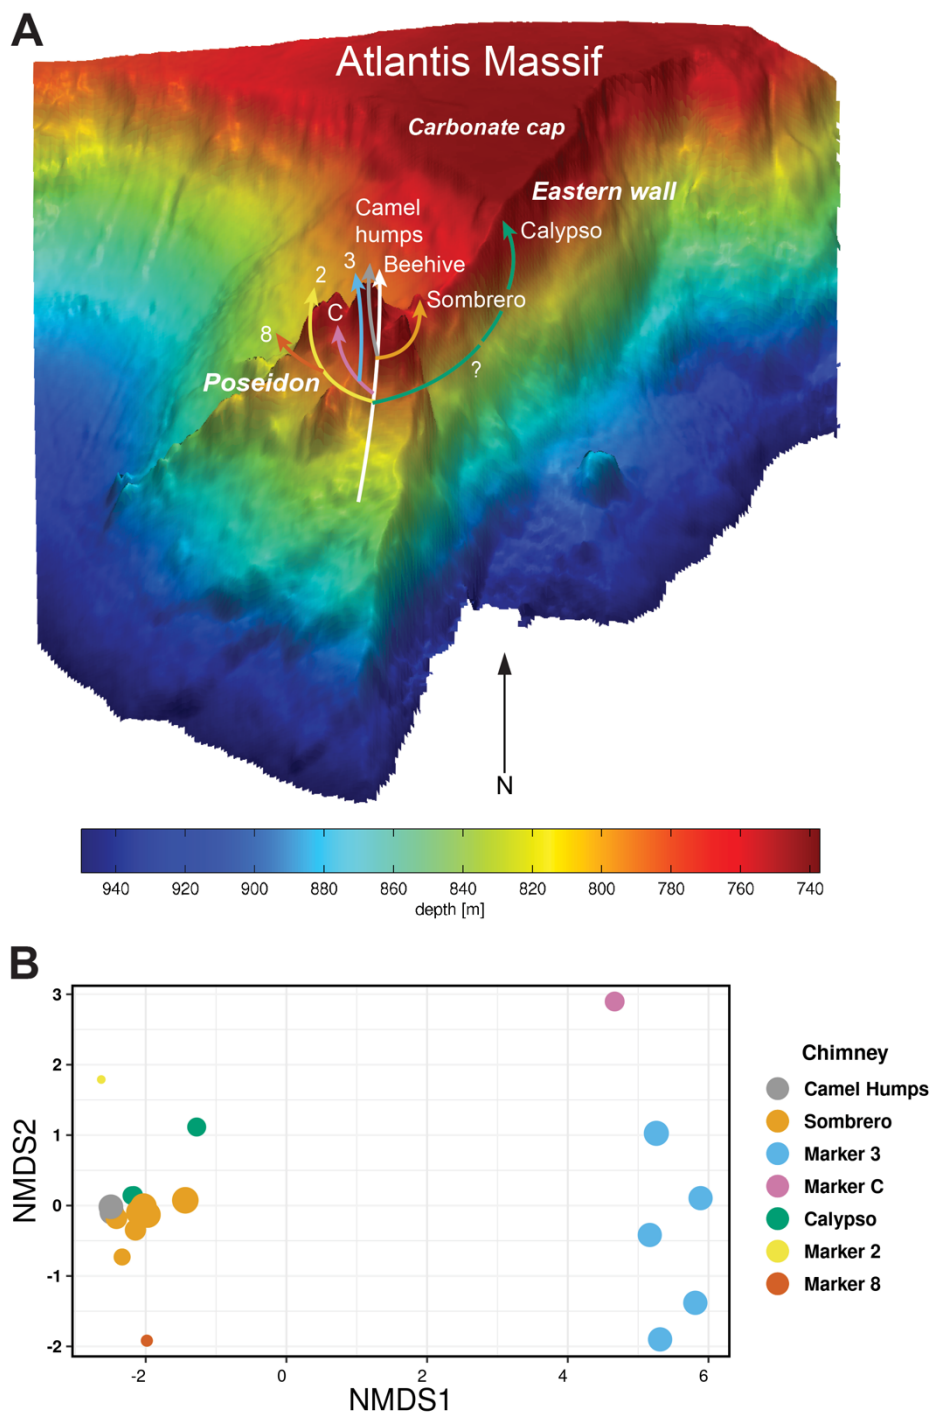

**Figure 1.** The Lost City hydrothermal field is located at 30°N, west of the Mid-Atlantic Ridge, on the southern wall of the Atlantis Massif. Part A shows a three-dimensional view of the field (after Kelley et al., 2005) featuring the massive Poseidon structure, which is composed of several actively venting chimneys. Hypothetical flow paths are informed by the aqueous geochemistry results reported here, by Aquino et al. (in review), and by prior studies referenced in the main text. Part B is a non-metric multidimensional scaling (NMDS) ordination of 16S rRNA amplicon sequence data where each data point represents the microbial community composition of one hydrothermal fluid sample. Sizes of data points are scaled to the measured sulfate concentration of that sample (Table 1).

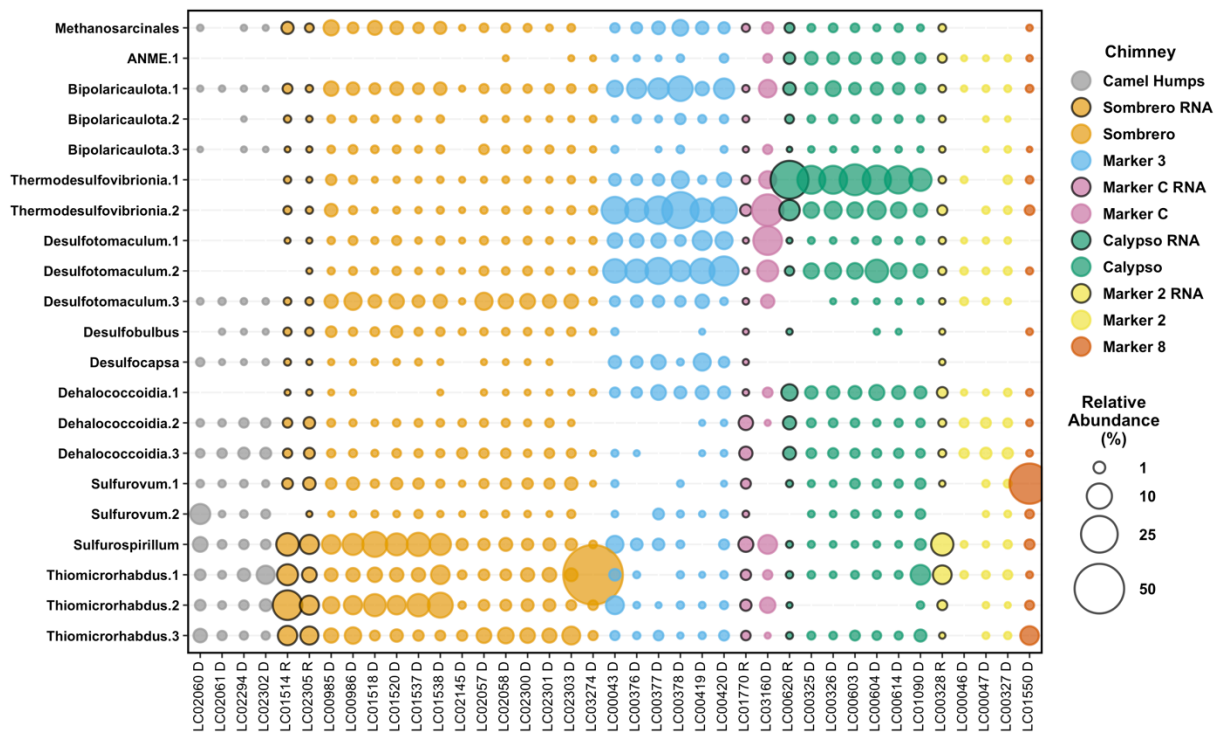

**Figure 2. Relative abundances of selected ASVs in Lost City hydrothermal fluid samples.** Amplicon libraries were generated from both DNA and RNA extractions; bubbles representing relative abundances in RNA libraries are highlighted with black borders. ASVs were selected to highlight the taxa that were the focus of this study, as well as additional taxa that are expected to be associated with hydrothermal environments and provide context for interpreting differences among fluid samples. A full table of ASV counts is provided in **Supplemental Table S2**.



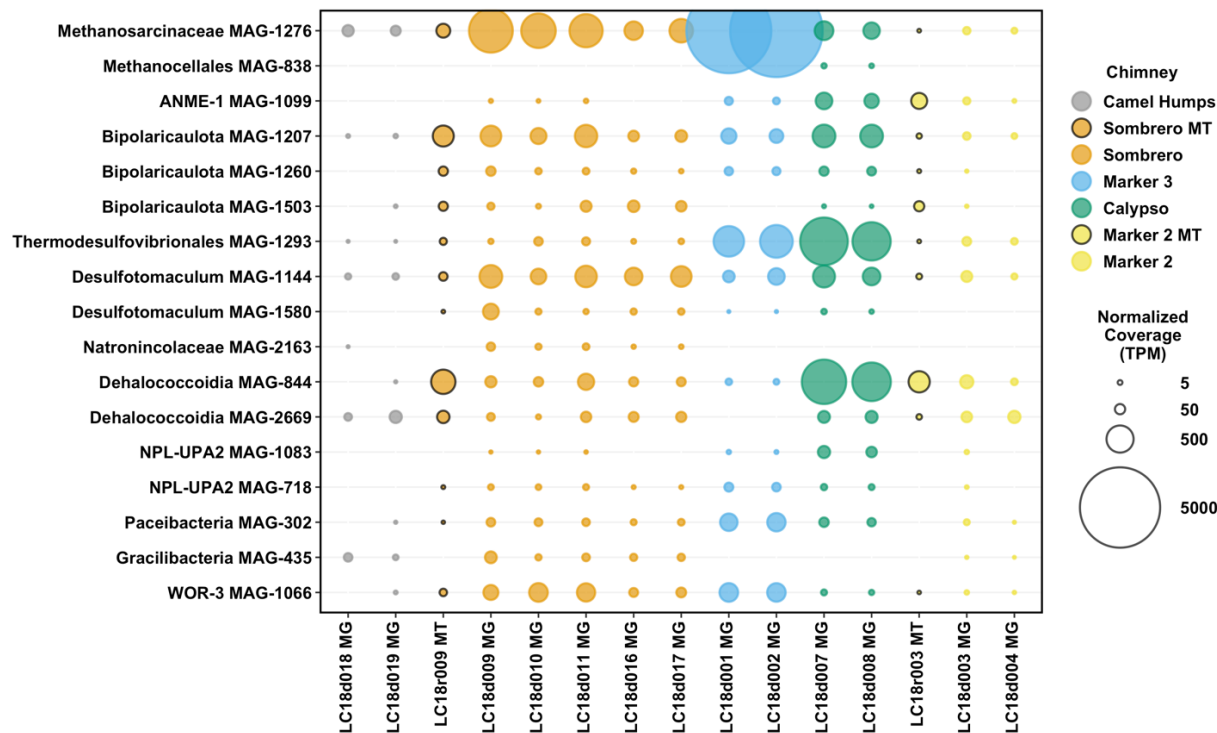

**Figure 3. Abundance of refined MAGs in Lost City hydrothermal fluid samples.** Total mapped read coverage was normalized to genome size and to the size of the metagenome or metatranscriptome library. The final normalized coverage is reported as a proportional unit (transcripts/fragments per million; TPM) suitable for cross-sample comparisons. Bubbles representing coverage in metatranscriptomes (MT), rather than metagenomes (MG), are highlighted with black borders. For clarity, not all MAGs are shown; a full coverage table is provided in **Supplemental Table S4**.

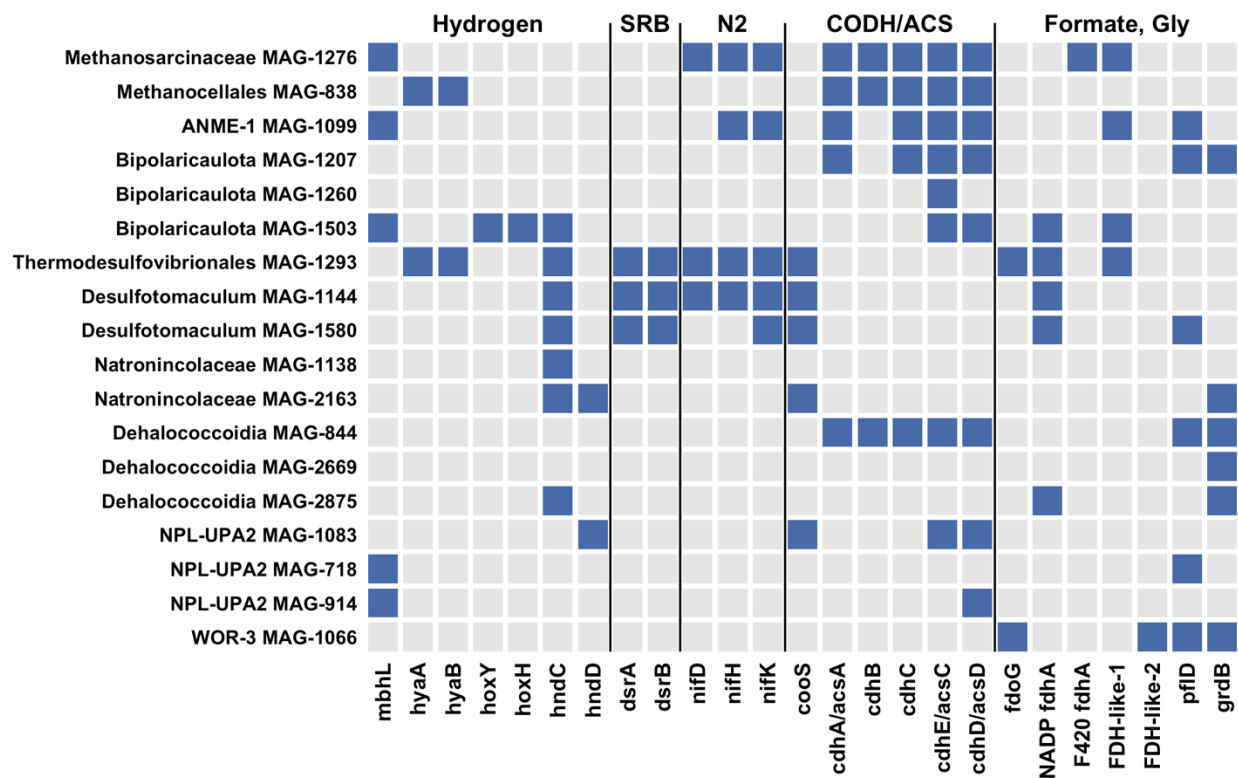

**Figure 4. Presence and absence of key genes in refined MAGs.** Genes defined by KEGG Orthology (see **Supplemental Table S5**) were selected to highlight potential metabolic capabilities to metabolize hydrogen gas, to reduce sulfate to sulfide (SRB), to fix nitrogen (N<sub>2</sub>) gas, to fix carbon dioxide via the Wood-Ljungdahl pathway (CODH/ACS), and to utilize formate or glycine as carbon sources. Patescibacteria MAGs (including Paceibacteria and Gracilibacteria) are not shown here because they lack all of the gene shown here.

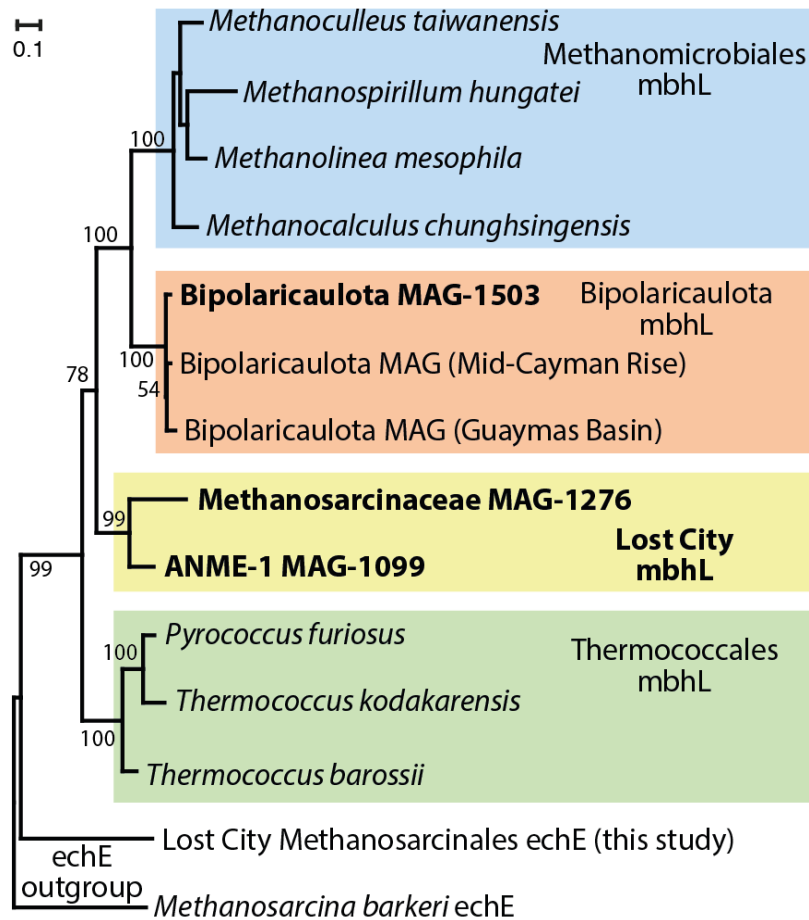

**Figure 5. Phylogeny of the large catalytic subunit of membrane-bound hydrogenase (mbhL).** Sequences identified in refined MAGs from this study are highlighted in bold font. The two archaeal sequences from Lost City (*Methanosarcinaceae* and ANME-1) form their own clade apart from all known mbhL sequences. The mbhL sequence from a Lost City Bipolaricaulota MAG clusters together with Bipolaricaulota MAGs from other hydrothermal environments. Bootstrap support values are shown for each node. An expanded version of this figure including the gene order for the mbh gene cluster is provided as **Supplemental Figure S4**.

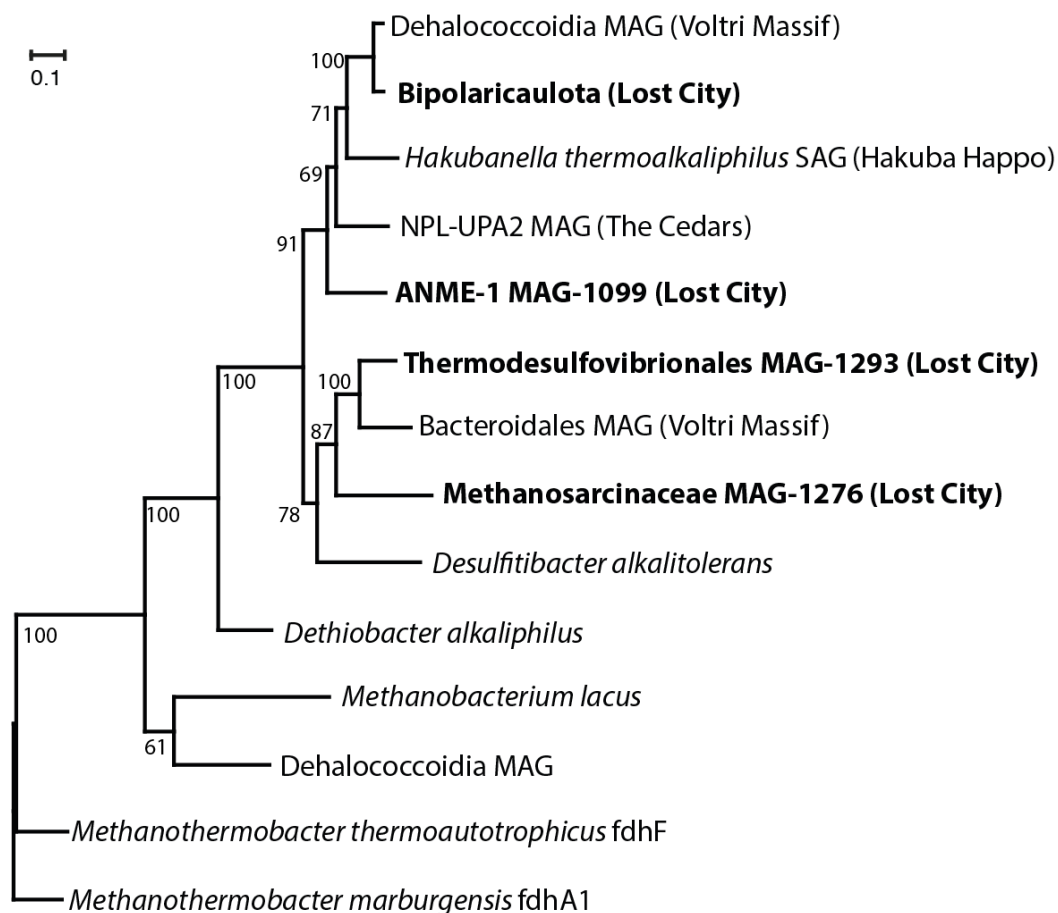

**Figure 6. Phylogeny of divergent FDH-like sequences.** Sequences identified in refined MAGs from this study are highlighted in bold font. Their closest matches in the NCBI nr database are from other serpentinite-hosted springs (Voltri Massif, Hakuba Happo, and The Cedars). The FDH-like sequences shown here include an iron-sulfur binding domain and a molybdopterin oxidoreductase domain, which are encoded as two separate coding regions in some species and as a fused coding region in others (see **Supplemental Figure S4** for an expanded version of this figure including genomic context). The phylogeny was constructed from the conserved oxidoreductase domain. Bootstrap support values are shown for each node. The Lost City *Bipolaricaulota* sequence was identified in multiple BinSanity bins classified as *Bipolaricaulota*, but it was not included in the final, manually refined MAGs.

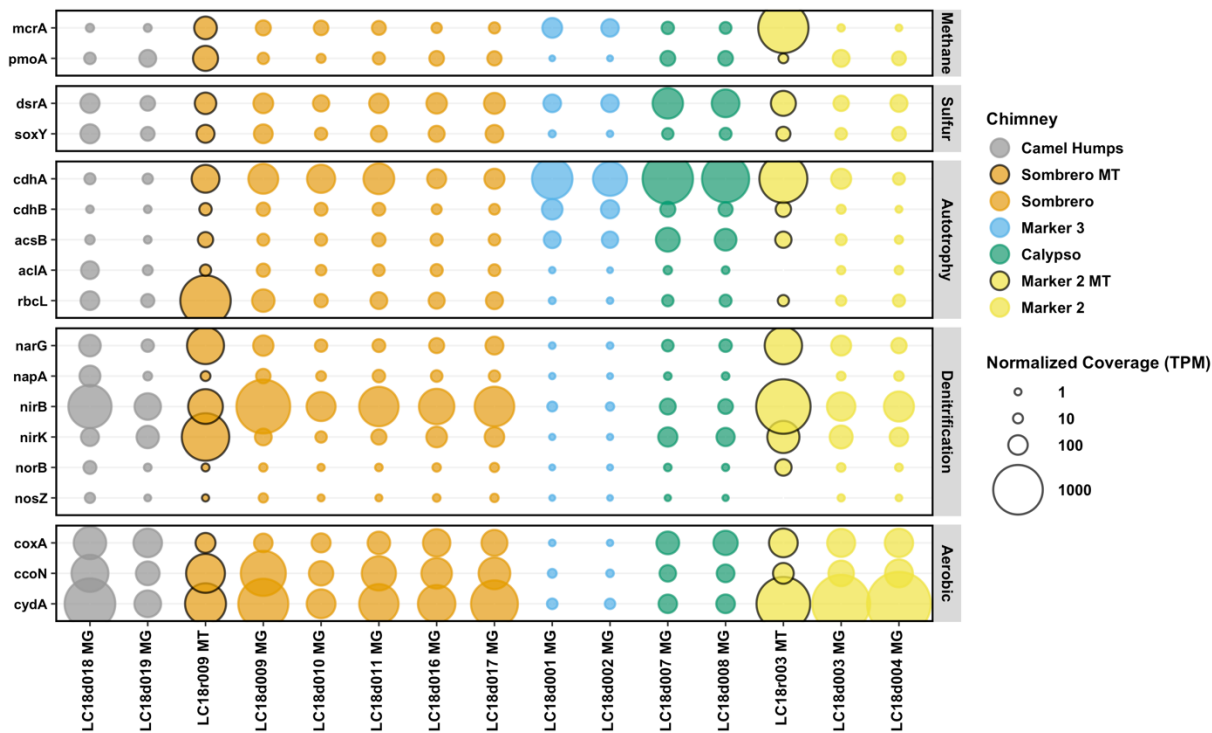

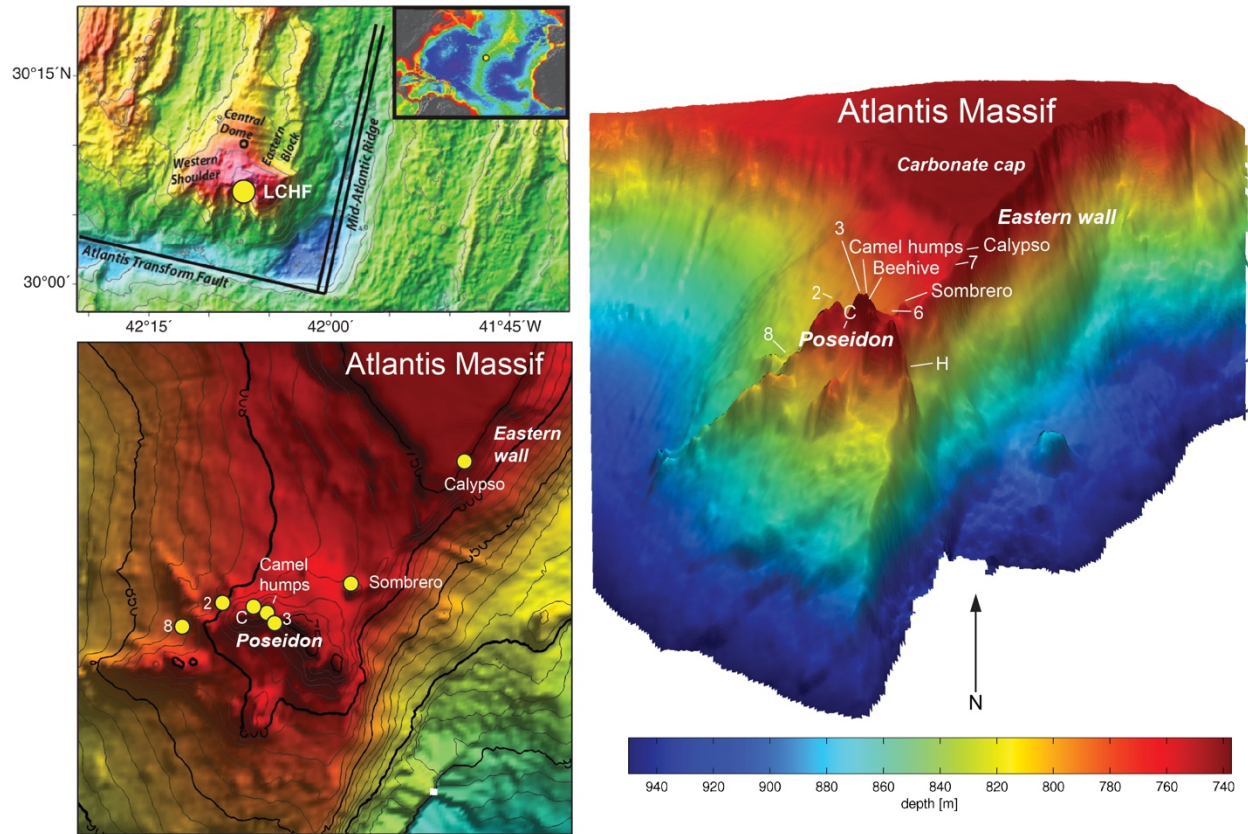

**Supplemental Figure S1.** Extended version of **Figure 1** showing the location of the Lost City hydrothermal field near the summit of the Atlantis Massif, which is located northwest of the intersection of the Mid-Atlantic Ridge and the Atlantis Transform Fault.

**Camel Humps**

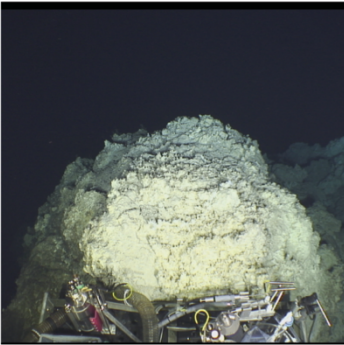

**Marker 3**

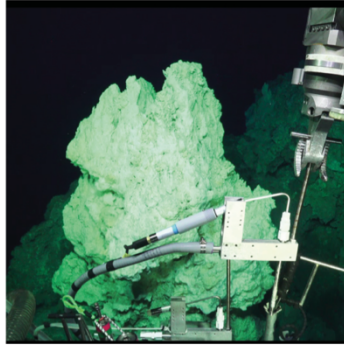

**Marker 2**

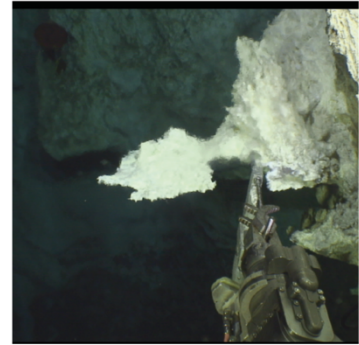

**Calypso**

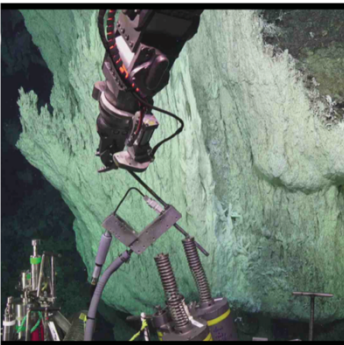

**Sombrero 1**

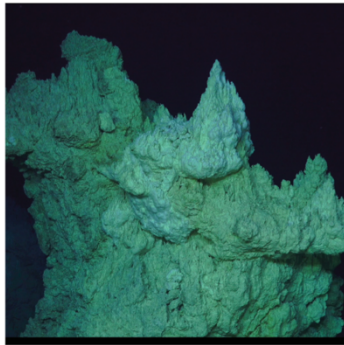

**Sombrero 2**

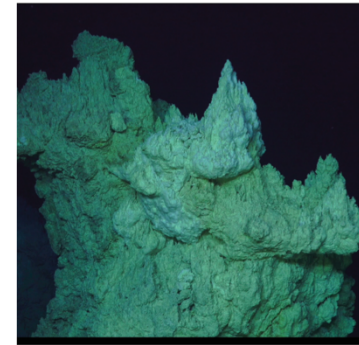

**Supplemental Figure S2.** Photographs of sampling locations for this study, captured on the seafloor by ROV *Jason*. Camel Humps and Marker 3 are visually distinct structures despite their nearby locations. Sombrero was sampled at the same location on two separate dives.

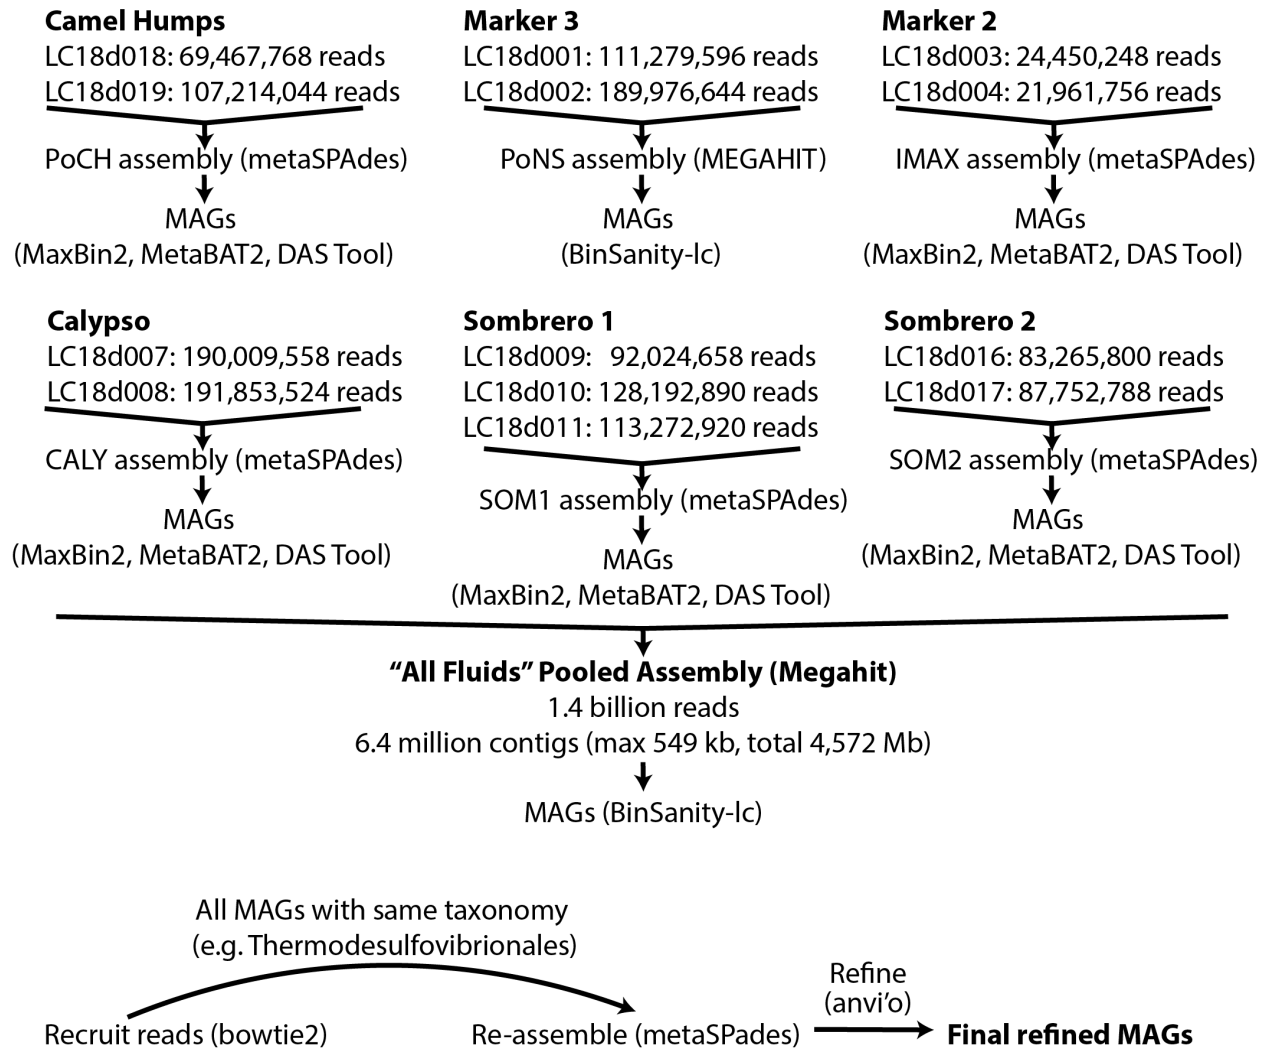

**Supplemental Figure S3.** Overall workflow for assembly of metagenomes and binning into metagenome-assembled genomes (MAGs). Assemblies were performed with reads pooled from each chimney location (chimney-specific assemblies), and one “all fluids” pooled assembly was performed with all metagenomic reads from all chimney locations. Initial bins constructed with automated tools were used as a template for recruiting metagenomic reads for a re-assembly and manual curation and refinement of the final MAGs.



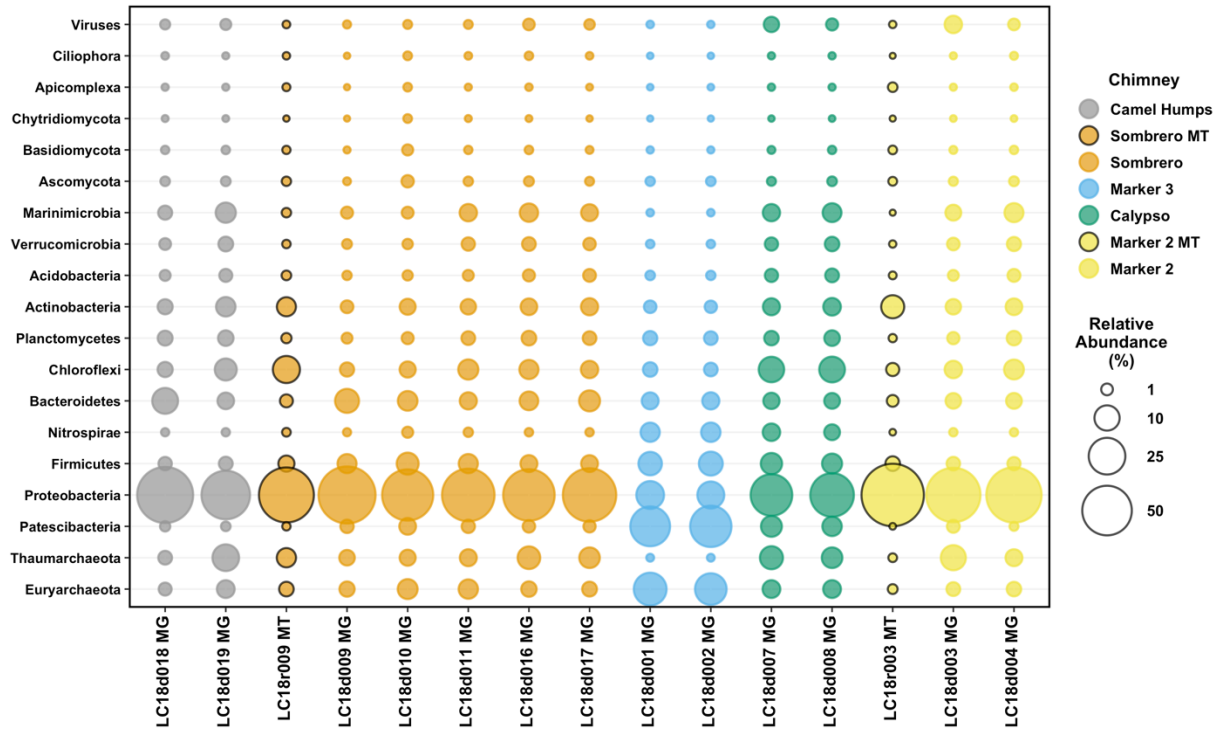

**Supplemental Figure S4. Percent of reads classified to the top 18 phyla (plus viruses) in Lost City hydrothermal fluid samples.** Unassembled reads were classified using Kaiju with its default NCBI nr+euk database. Percentages were calculated as the number of reads classified to each phyla divided by the total number of reads in that library that could be classified to the phylum level by Kaiju. Bubbles representing reads in metatranscriptomes (MT), rather than metagenomes (MG), are highlighted with black borders.

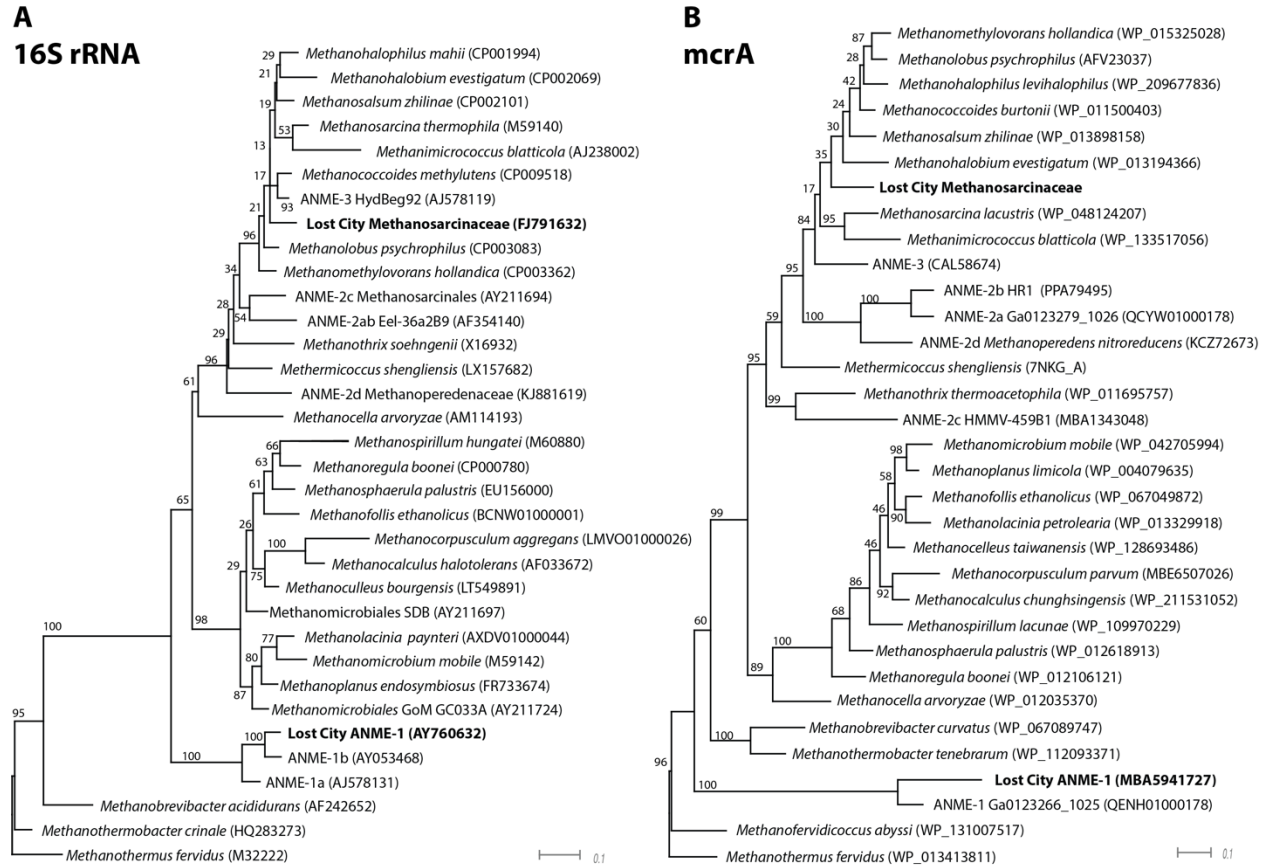

**Supplemental Figure S5. Phylogenies of 16S rRNA and mcrA (alpha subunit of methyl coenzyme M reductase) highlighting Lost City MAGs classified as Methanosarcinaceae and ANME-1.** Bootstrap support values are shown for each node. Sequences and accession IDs are provided in the Zenodo-archived GitHub repository accessible via DOI: [10.5281/zenodo.5798015](https://doi.org/10.5281/zenodo.5798015).

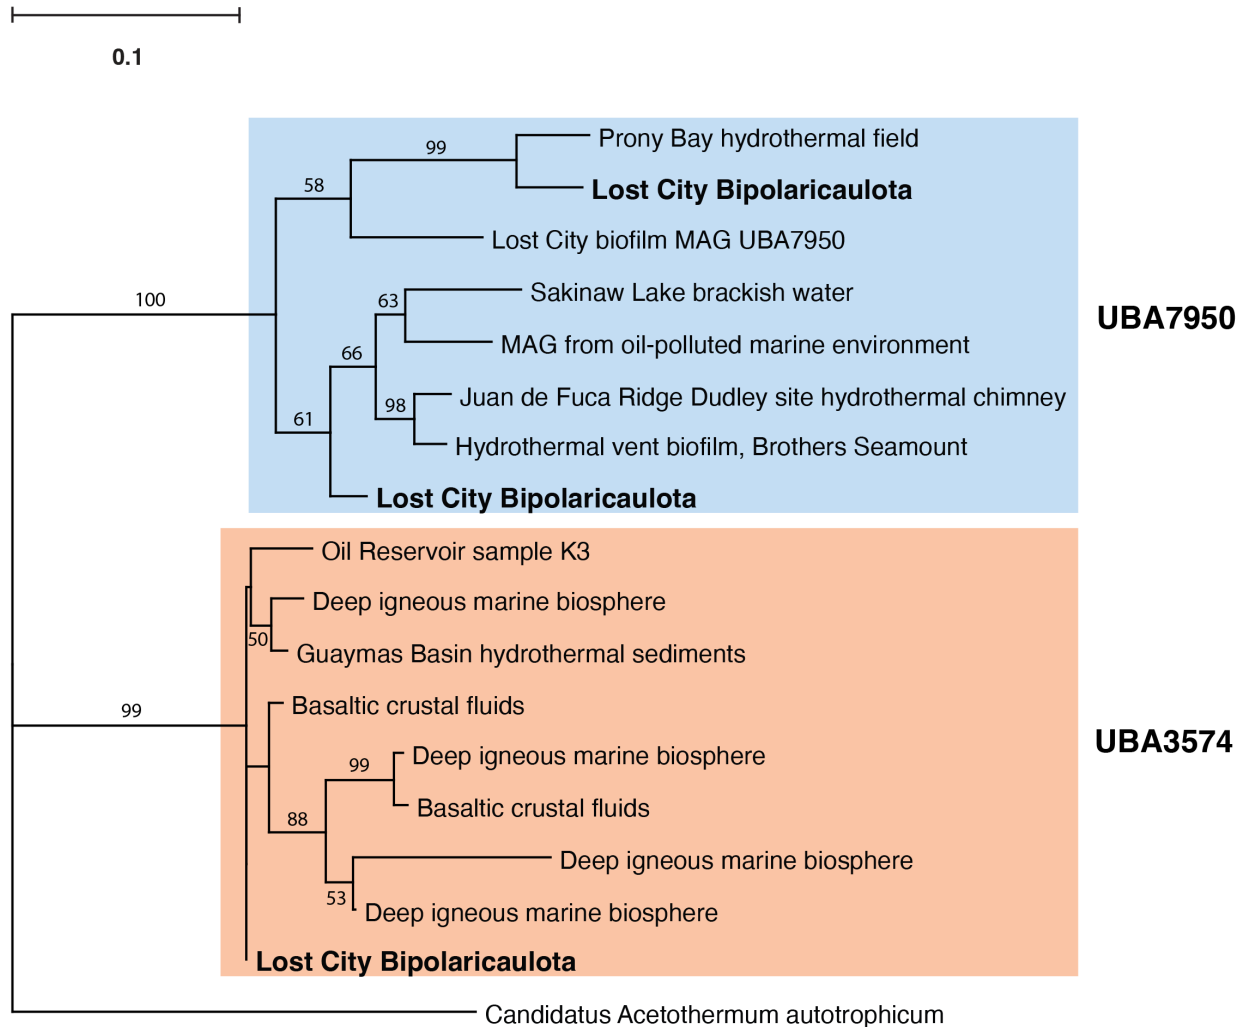

**Supplemental Figure S6. Phylogeny of 16S rRNA highlighting Lost City sequences classified as Bipolaricaulota.** The most abundant Lost City Bipolaricaulota 16S rRNA sequences cluster into two distinct monophyletic groups, classified by GTDB as UBA3574 and UBA7950, which corresponds to the classifications of the three refined Bipolaricaulota MAGs (**Figure 3**). The UBA7950 sequences are further divided into two clades, one of which includes a MAG assembled by Parks et al. (2018) from our previous study of Lost City chimney biofilms (DOHL01000117). Bootstrap support values greater than 50 are shown for each node. Sequences and accession IDs are provided in the Zenodo-archived GitHub repository accessible via DOI: 10.5281/zenodo.5798015.

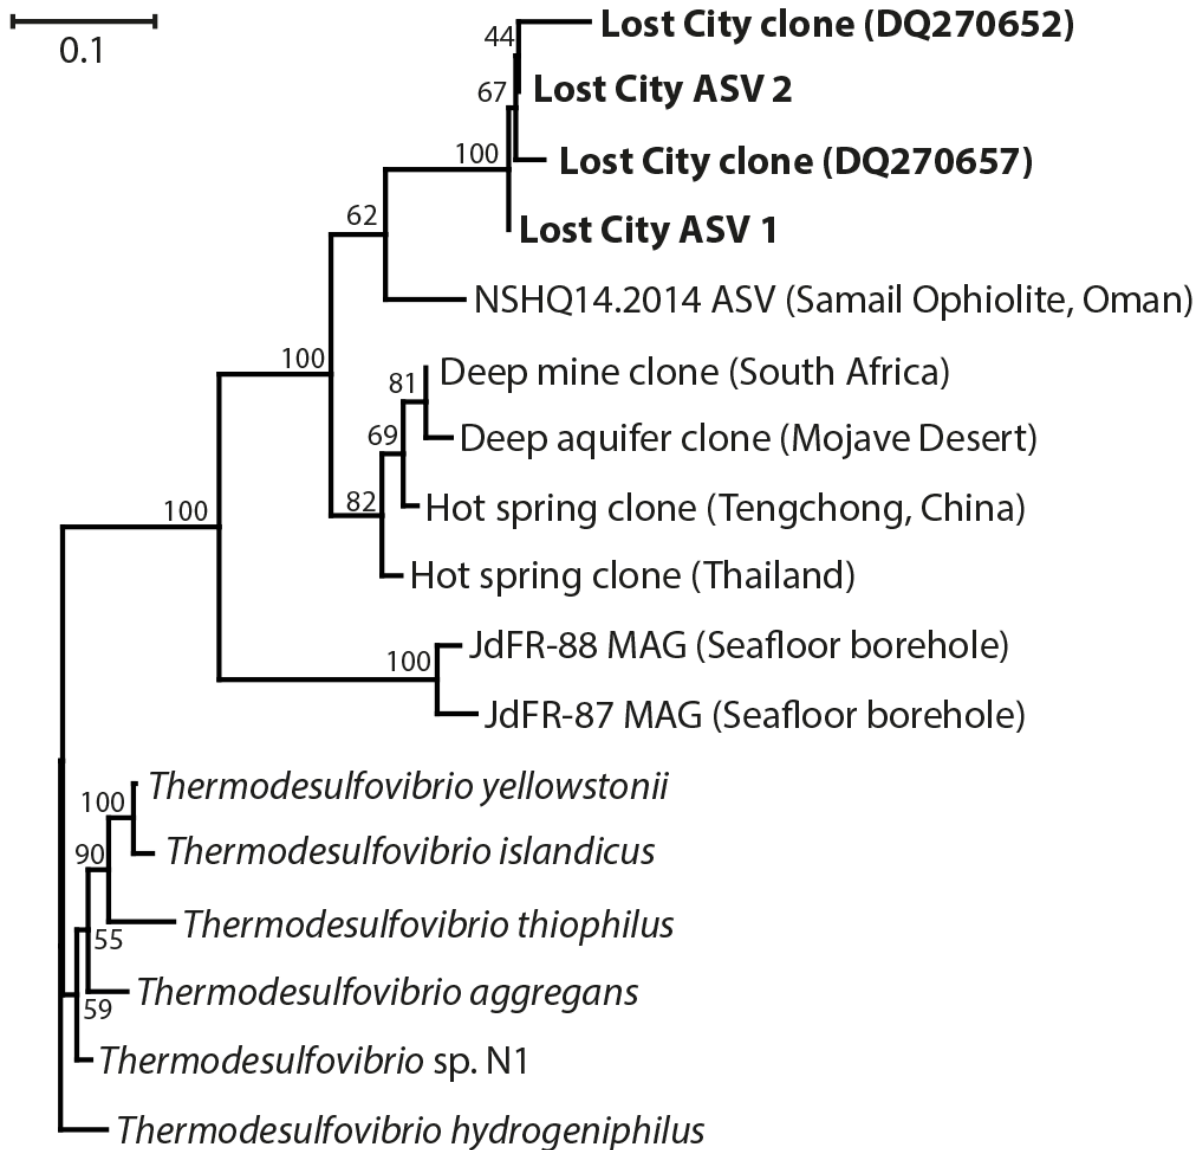

**Supplemental Figure S7. Phylogeny of 16S rRNA highlighting Lost City sequences**

**classified as *Thermodesulfovibrionia*.** The two Lost City ASVs differ from each other by a single base and match sequences from a previously published clone library of Lost City chimney biofilms (Brazelton et al., 2006). They share 90% nucleotide identities with their closest neighbor, an ASV from alkaline borehole fluids in the Samail Ophiolite, Oman (Rempfert et al., 2017). Sequences and accession IDs are provided in the Zenodo-archived GitHub repository accessible via DOI: 10.5281/zenodo.5798015.

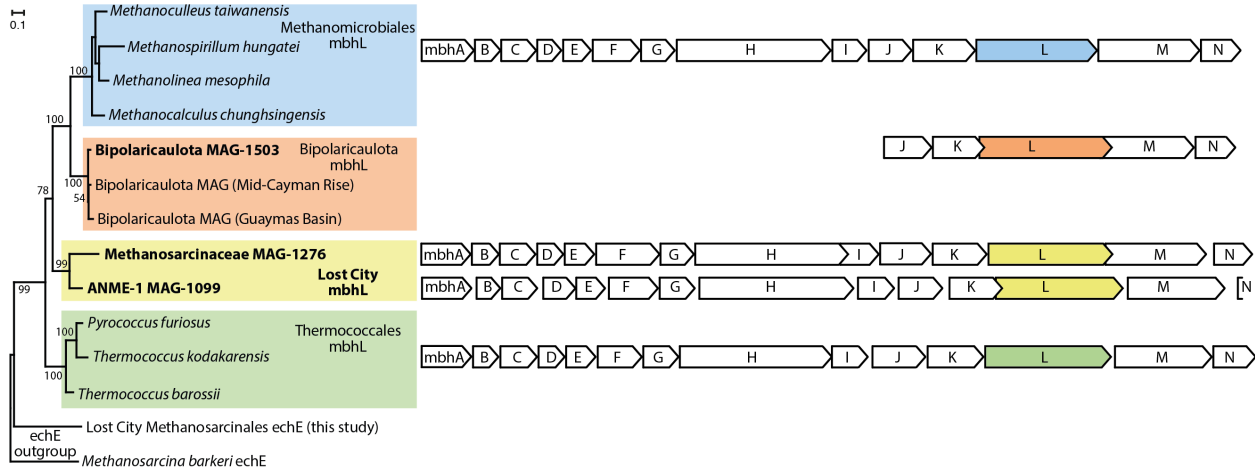

### Supplemental Figure S8. Phylogeny of the large catalytic subunit of membrane-bound hydrogenase (mbhL) and the mbh gene cluster (expanded version of Figure 5).

Sequences and accession IDs are provided in the Zenodo-archived GitHub repository accessible via DOI: 10.5281/zenodo.5798015.

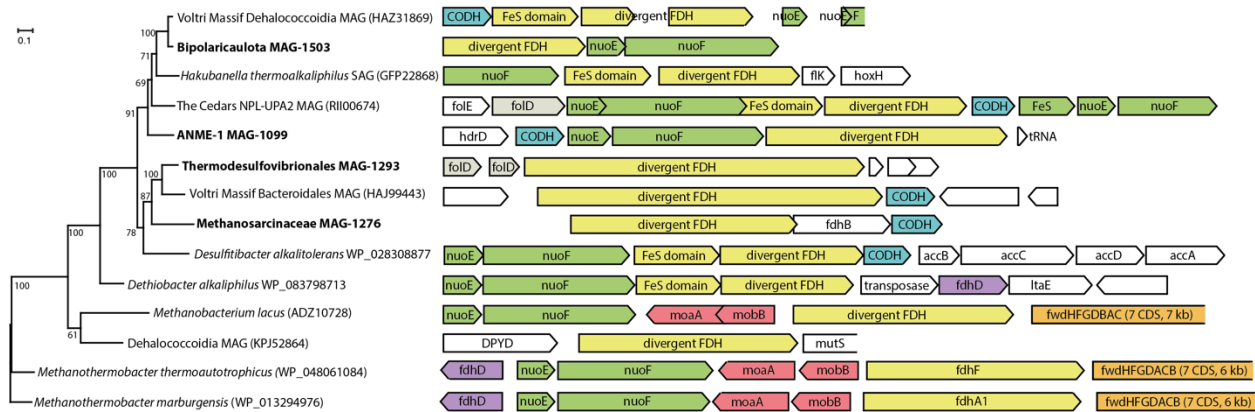

### Supplemental Figure S9. Phylogeny of divergent FDH-like sequences (expanded version of Figure 6).

In most cases, the divergent FDH-like gene was flanked by nuoEF (encoding NADH-quinone oxidoreductase) and a hypothetical sequence with a conserved domain associated with monomeric carbon monoxide dehydrogenase (CODH). Furthermore, most of these gene clusters contained signs of genome instability just upstream or downstream such as pseudogenes, transposases, or a toxin/antitoxin system (not shown here). Sequences and accession IDs are provided in the Zenodo-archived GitHub repository accessible via DOI: 10.5281/zenodo.5798015.

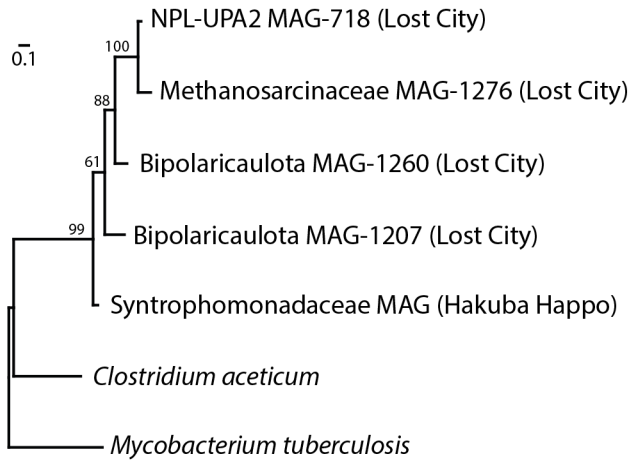

**Supplemental Figure S10. Phylogeny of divergent sequences predicted to encode carbonic anhydrase.** Lost City sequences form a novel clade including a predicted sequence from a MAG recovered from another serpentinite-hosted spring (Hakuba Happo). Bootstrap support values are shown for each node. Sequences and accession IDs are provided in the Zenodo-archived GitHub repository accessible via DOI: 10.5281/zenodo.5798015.

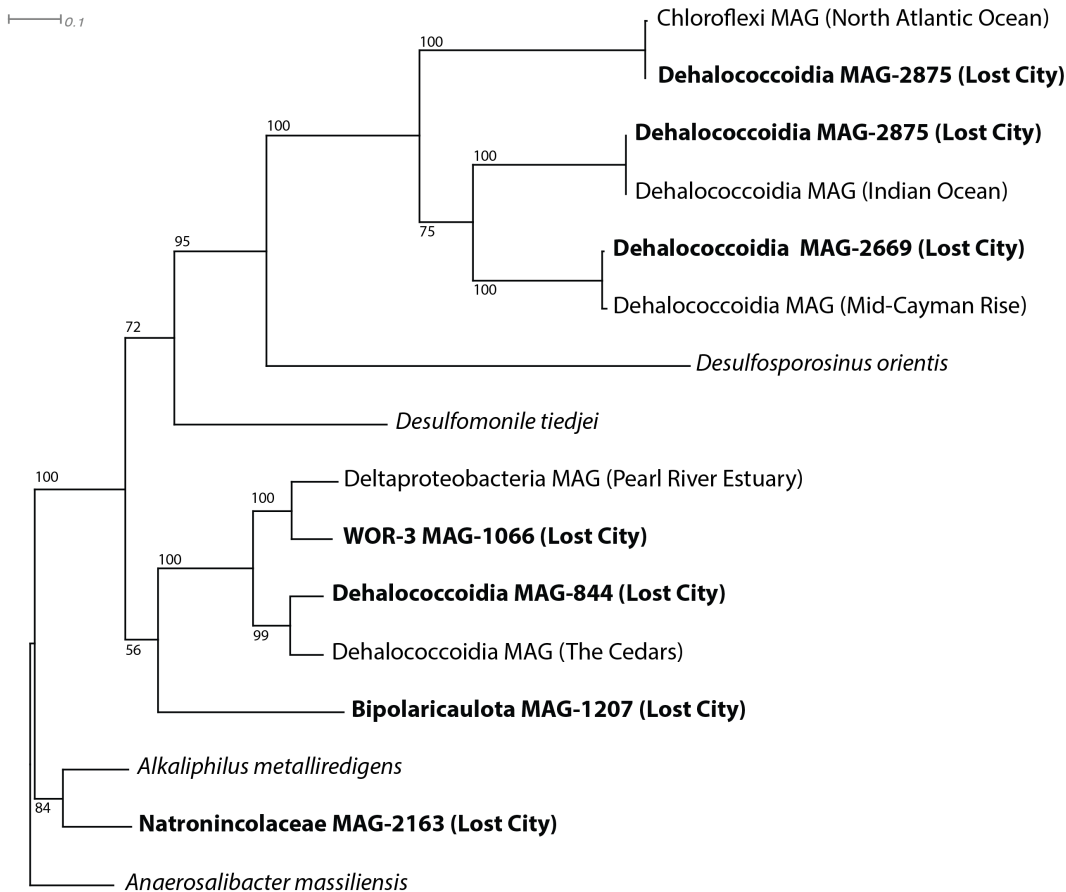

**Supplemental Figure S11. Phylogeny of GrdB (beta subunit of glycine reductase).** Lost City Bipolaricaulota, Dehalococcoidia, WOR-3, and Natronincolaceae MAGs share moderate sequence similarity (58-88% amino acid identities) with sequences from other MAGs (including one from another site of serpentinization, The Cedars), but limited similarity with sequences from characterized species. Lost City Dehalococcoidia MAGs that belong to the SAR202 marine cluster, including two copies from MAG-2875, form a separate clade from other Lost City MAGs that are more likely to represent seafloor organisms. A second Natronincolaceae MAG not shown here lacks GrdB but includes all other genes associated with glycine reductase (**Supplemental Table S5**). Bootstrap support values are shown for each node. Sequences and accession IDs are provided in the Zenodo-archived GitHub repository accessible via DOI: 10.5281/zenodo.5798015.

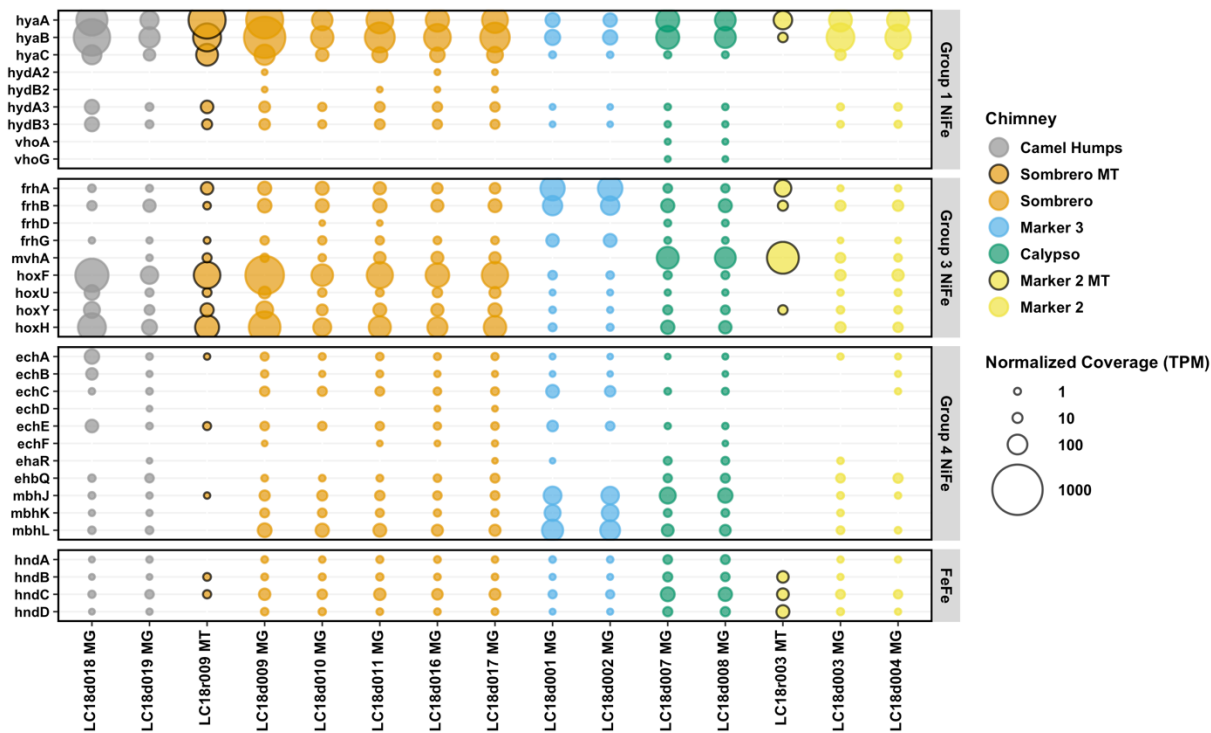

**Supplemental Figure S12. Abundance of predicted hydrogenase sequences in Lost City hydrothermal fluid samples.** Metagenomic coverage was normalized to predicted protein length and to the size of the metagenome or metatranscriptome library. The final normalized coverage is reported as a proportional unit (transcripts/fragments per million; TPM) suitable for cross-sample comparisons. Bubbles representing coverage in metatranscriptomes (MT), rather than metagenomes (MG), are highlighted with black borders. Genes are defined with KEGG Orthology; see **Supplemental Table S5**.



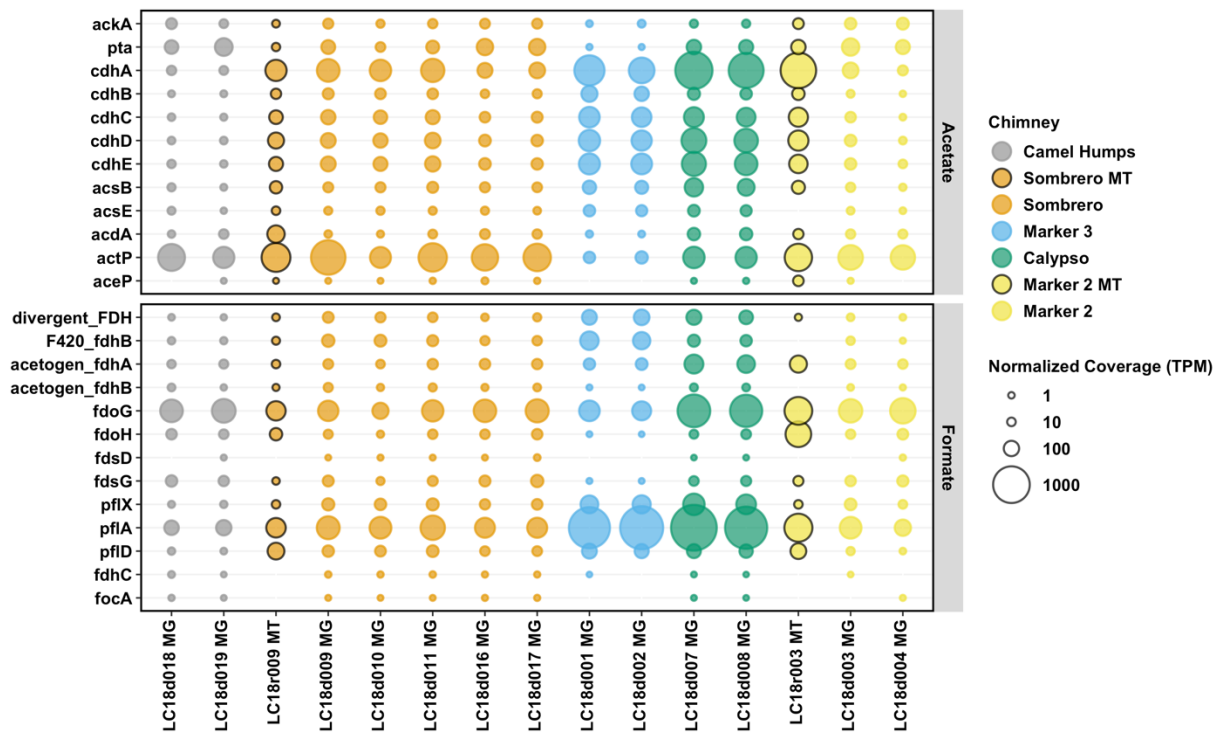

**Supplemental Figure S13. Abundances of predicted sequences associated with acetate and formate metabolism in Lost City hydrothermal fluid samples.** Metagenomic coverage was normalized to predicted protein length and to the size of the metagenome or metatranscriptome library. The final normalized coverage is reported as a proportional unit (transcripts/fragments per million; TPM) suitable for cross-sample comparisons. Bubbles representing coverage in metatranscriptomes (MT), rather than metagenomes (MG), are highlighted with black borders. Genes are defined with KEGG Orthology; see **Supplemental Table S5**.

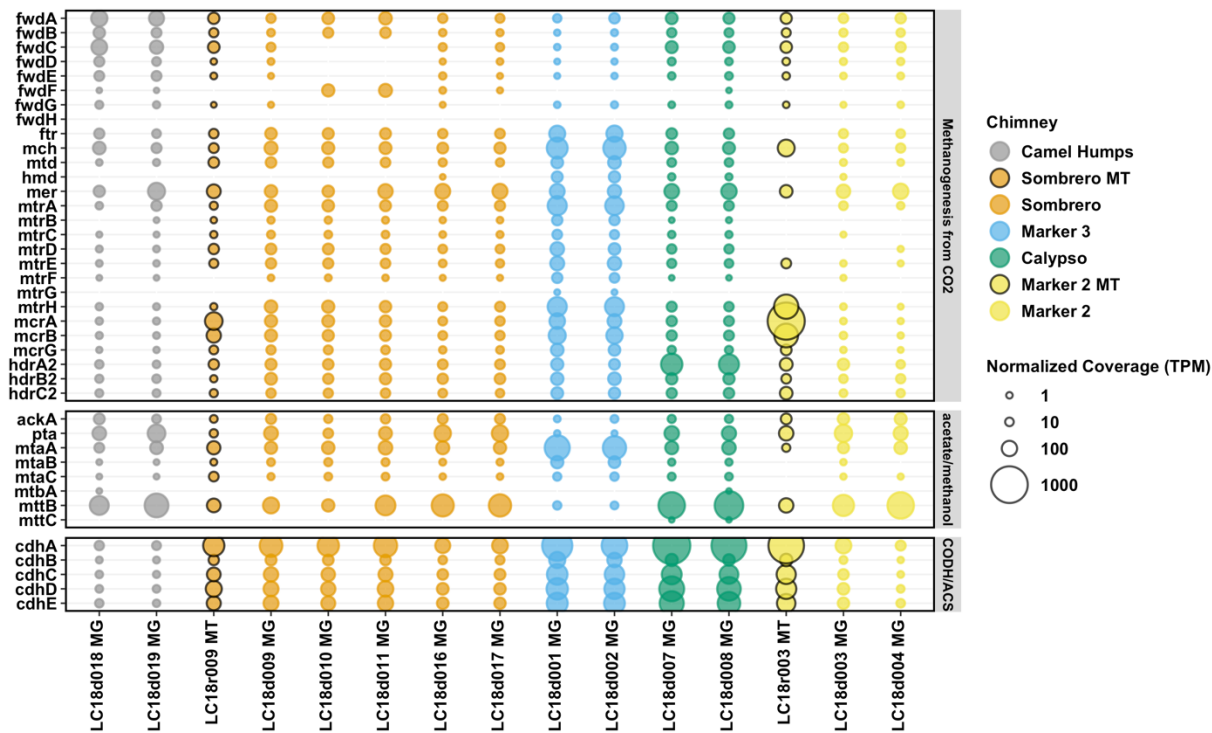

**Supplemental Figure S14. Abundance of predicted sequences associated with methanogenesis in Lost City hydrothermal fluid samples.** Metagenomic coverage was normalized to predicted protein length and to the size of the metagenome or metatranscriptome library. The final normalized coverage is reported as a proportional unit (transcripts/fragments per million; TPM) suitable for cross-sample comparisons. Bubbles representing coverage in metatranscriptomes (MT), rather than metagenomes (MG), are highlighted with black borders. Genes are defined with KEGG Orthology; see **Supplemental Table S5**.

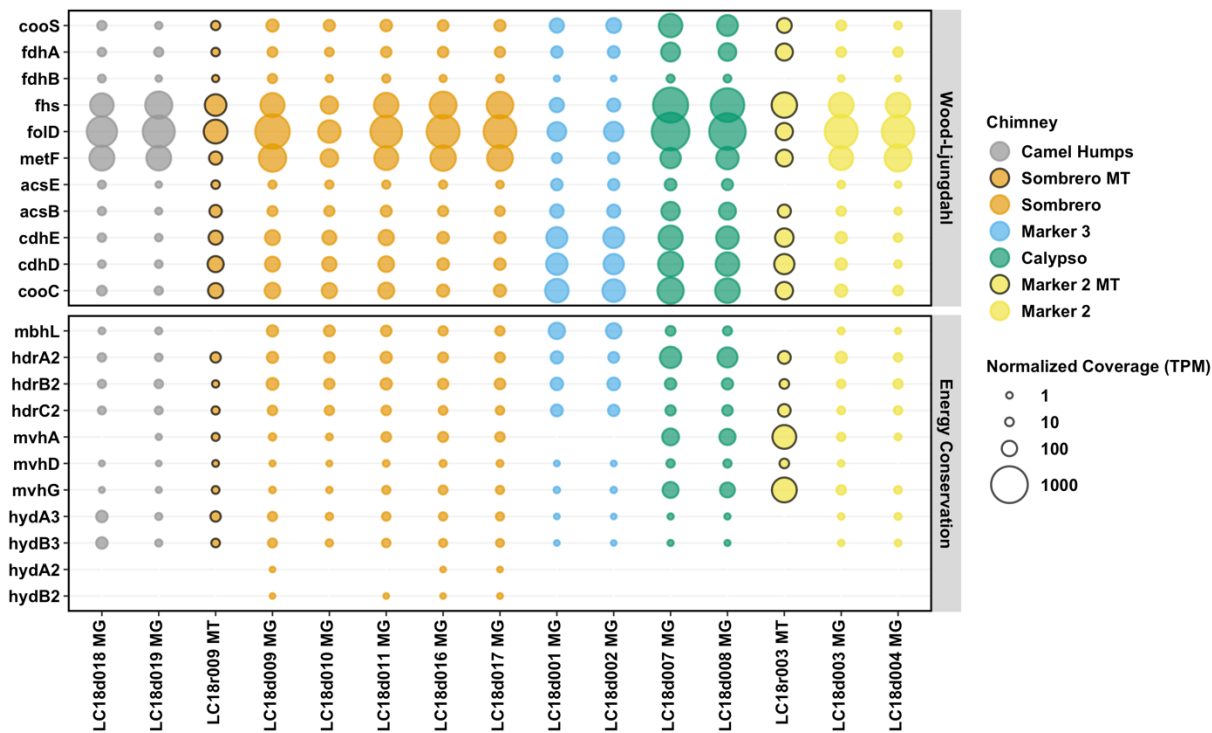

**Supplemental Figure S15. Abundance of predicted sequences associated with acetogenesis in Lost City hydrothermal fluid samples.** Metagenomic coverage was normalized to predicted protein length and to the size of the metagenome or metatranscriptome library. The final normalized coverage is reported as a proportional unit (transcripts/fragments per million; TPM) suitable for cross-sample comparisons. Bubbles representing coverage in metatranscriptomes (MT), rather than metagenomes (MG), are highlighted with black borders. Genes are defined with KEGG Orthology; see **Supplemental Table S5**.
